# Supplementary material for: Mixed-ligand complexes of copper(ii) with thienoyltrifluoroacetonate and nitrogen containing ligands: synthesis, structures, antimicrobial activity, cytotoxicity, Hirshfeld surface analysis and DFT studies
Source: Royal Society of Chemistry journal article supplement (doi:10.1039/d2ra02428d), 2022-01-01

Supporting Information

**Mixed-ligand complexes of copper(II) with thienoyltrifluoroacetate and nitrogen containing ligands: synthesis, structures, antimicrobial activity, cytotoxicity, Hirshfeld surface analysis and DFT studies**

Helen Oluwatola Omoregie<sup>a\*</sup>, Oluwakemi A. Oloba-Whenu<sup>b</sup>, Tolulope M. Fasina<sup>b</sup>, Alexandra Friedrich<sup>c</sup>, Martin Haehnel<sup>c</sup>, Todd B. Marder<sup>c</sup>

<sup>a</sup>Department of Chemistry, Faculty of Science, University of Ibadan, Nigeria

<sup>b</sup>Department of Chemistry, Faculty of Science, University of Lagos, Nigeria

<sup>c</sup>Institute of Inorganic Chemistry, Julius-Maximilians-Universität Würzburg, Am Hubland, 97074 Würzburg, Germany

**Electronic Supplementary Information (ESI)**

Electronic Supplementary Information (ESI) Available:

**Table of Contents**

|                                                                                                               |        |
|---------------------------------------------------------------------------------------------------------------|--------|
| Antimicrobial activity and cytotoxicity data -----                                                            | S2-3   |
| Geometry optimized molecular structures of the title square planar complexes-----                             | S4     |
| Optimized structures at the PBE1PBE/6-311g(d,p) level of theory for the square based pyramidal complexes----- | S5     |
| Selected optimized and experimental geometric parameters for the complexes-----                               | S6-8   |
| Electrostatic potential surfaces of the copper complexes at the PBE1PBE/6-311g(d,p) level of theory-----      | S9     |
| Fingerprint plots for the complexes-----                                                                      | S10-15 |
| Hirshfeld surfaces-----                                                                                       | S16    |
| Summary of the various interactions (in %) in the crystal of the complexes-----                               | S17    |
| Solid-state molecular structures of the complexes-----                                                        | S18-20 |
| Single-crystal X-ray diffraction data and refinement-----                                                     | S21-22 |
| Selected bond lengths (Å), distances (Å), and angles (°) of the complexes-----                                | S23    |
| Continuous Shape measurements (CSM) of the complexes-----                                                     | S24    |
| Calculated absorption UV-visible spectra from TD-DFT at the m06-2x/6-311++G(d,p) level of theory -----        | S24    |
| UV/Visible and IR Spectra-----                                                                                | S25-50 |

**Table S1: Antimicrobial activity and cytotoxicity data of mixed-ligand complexes of copper(II) with thienoyltrifluoroacetate and nitrogen containing ligands**

| Compound                        | <i>S. aur</i> | <i>B. sub</i> | <i>K. pne</i> | <i>E. coli</i> | <i>S. ent</i> | <i>P. aer</i> | <i>C.a</i> | <i>A.n</i> | <i>Pen</i> | <i>Rhiz</i> | LC <sub>50</sub> |
|---------------------------------|---------------|---------------|---------------|----------------|---------------|---------------|------------|------------|------------|-------------|------------------|
| TTA-H                           | 17            | 16            | ND            | 21             | 17            | 36            | ND         | ND         | ND         | ND          | ND               |
| [Cu(TTA)(phen)NO <sub>3</sub> ] | 27            | 22            | 24            | 14             | 22            | 22            | 14         | 14         | 14         | 12          | 157.99           |
| [Cu(TTA)(bipy)NO <sub>3</sub> ] | 32            | 28            | 26            | 29             | 16            | 33            | 14         | 14         | 12         | 12          | 115.82           |
| [Cu(TTA)(phen)Cl]               | 37            | 30            | 30            | 22             | 16            | 21            | 16         | 14         | 14         | 12          | 107.66           |
| [Cu(TTA)(bipy)Cl]               | 25            | 29            | 24            | 22             | 23            | 33            | 20         | 20         | 18         | 16          | 152.48           |
| [Cu(TTA)tmenCl]                 | 20            | 22            | 20            | 20             | 14            | 18            | 18         | 16         | 14         | 14          | 104.76           |
| Gentamicin(10µg/ml)             | 40            | 38            | 40            | 38             | 40            | 38            | ND         | ND         | ND         | ND          |                  |
| Tioconazole(70%)                | ND            | ND            | ND            | ND             | ND            | ND            | 28         | 28         | 26         | 26          |                  |
| Methanol                        | No activities |               |               |                |               |               |            |            |            |             |                  |

Growth inhibition zone in millimeters (mm)

10-19-moderately active      20-29-active; 30 and above- very active

R= organism resistant to the extract      ND=not determined

N.B:

*S. aur = Staphylococcus aureus*

*B. sub = Bacillus subtilis*

*K. pne = Klebsiella pneumonia*

*E. coli = Escherichia coli*

*S. ent = Salmonella enterica*

*P. aer = Pseudomonas aeruginosa*

*Ca = Candida albicans*

*An = Aspergillus niger*

*Pen = Penicillium notatum*

*Rhiz = Rhizopus*

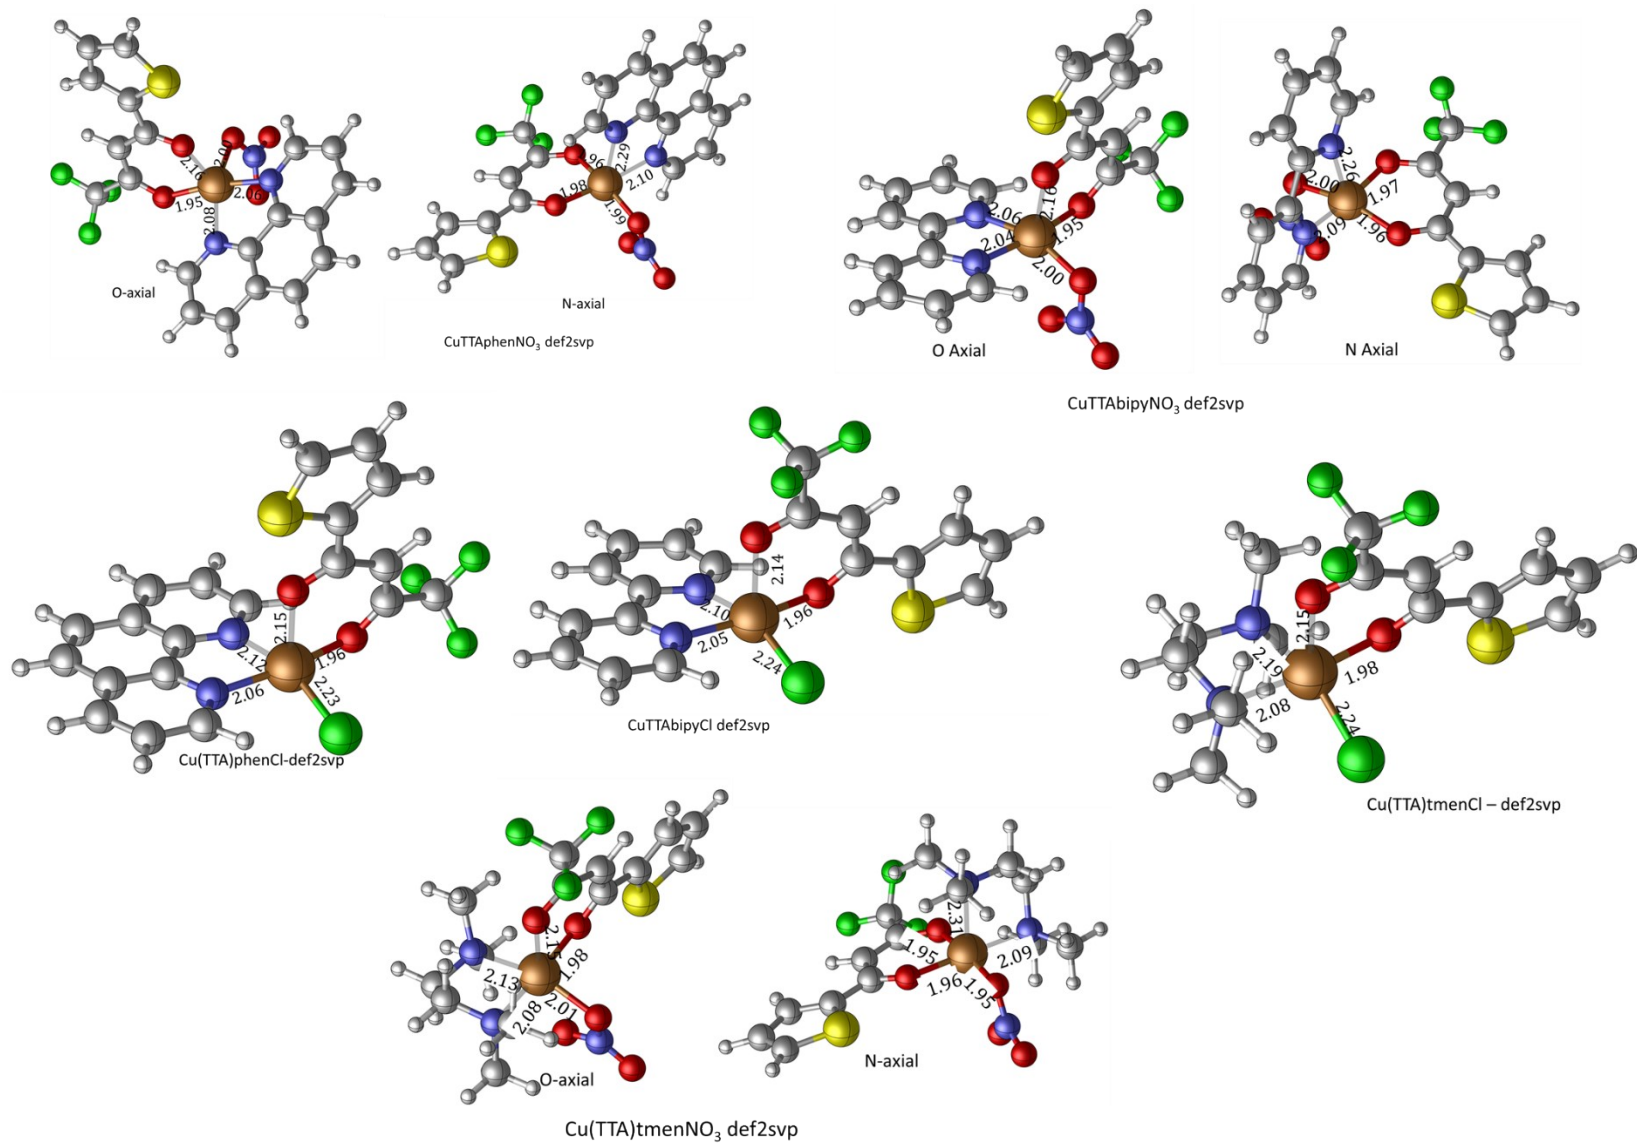

Figure S1: Geometry optimized molecular structures of the title square planar complexes starting from the experimentally determined structures at the PBE1PBE/def2svp level of theory.

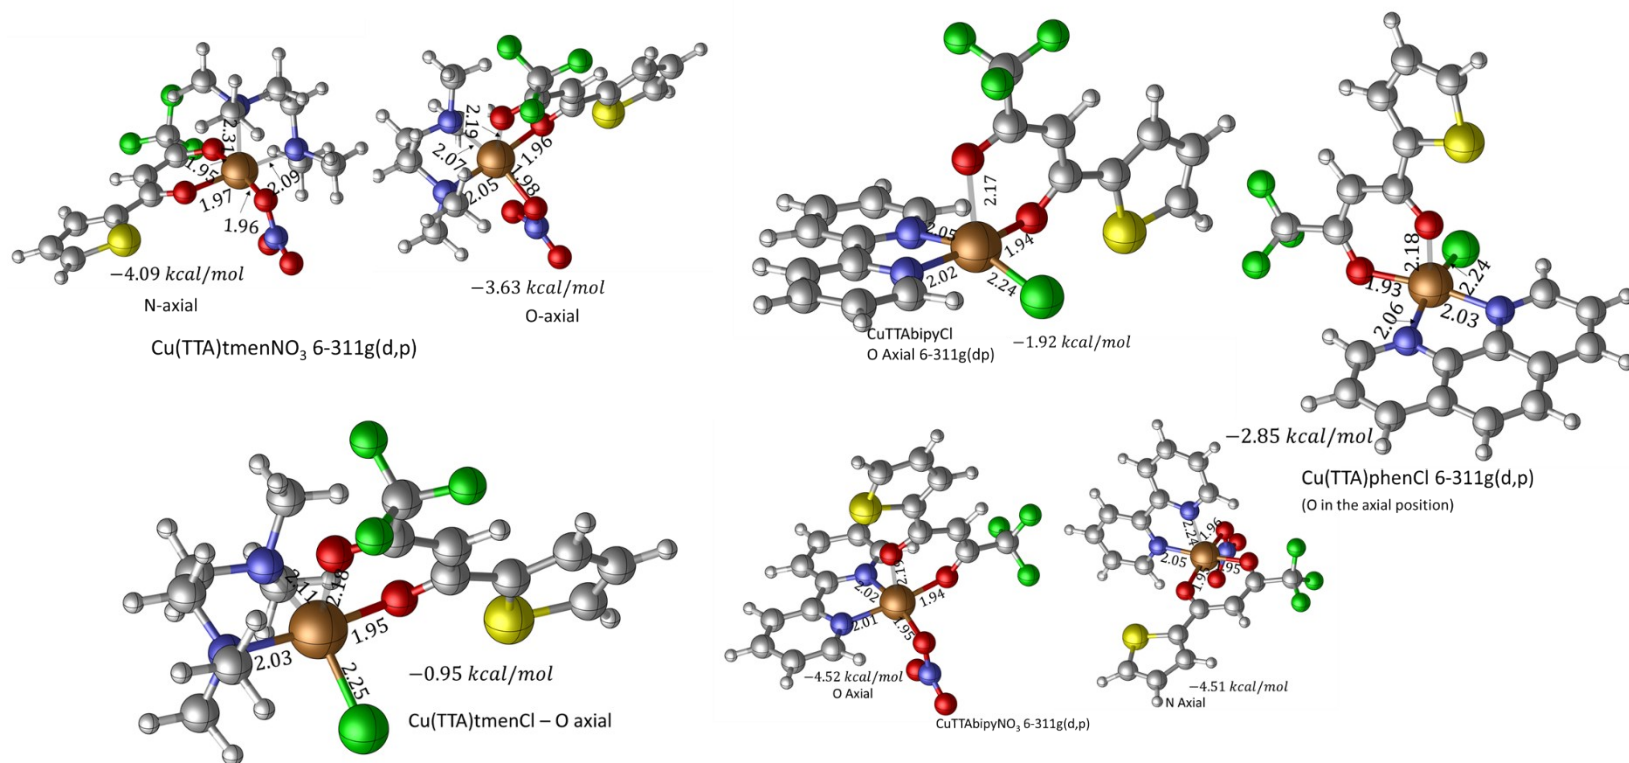

Figure S2: Geometry optimized structures at the PBE1PBE/6-311g(d,p) level of theory for the square based pyramidal complexes in which either the oxygen atom of the TTA ligand or nitrogen atom of the corresponding amine/imine is in the axial position. The relative energy values with respect to when NO<sub>3</sub> or Cl is the ligand are given for each optimized structure.

**Table S2: Selected optimized and experimental geometric parameters for Cu(TTA)PhenNO<sub>3</sub> at the PBE1PBE/6-311g(d,p) level of theory displayed in Figure 6, in the main article**

|                | Cu(TTA)phenNO <sub>3</sub> |           |
|----------------|----------------------------|-----------|
|                | Opt                        | Exp       |
| Cu1-O39        | 2.11                       | 2.241(2)  |
| Cu1-O16        | 1.93                       | 1.927(2)  |
| Cu1-O25        | 1.95                       | 1.929(2)  |
| Cu1-N2         | 2.01                       | 1.996(3)  |
| Cu1-N9         | 2.03                       | 2.017(3)  |
| O39-Cu-O16     | 95.6                       | 93.52(10) |
| O39-Cu-O25     | 103.2                      | 104.97(9) |
| O39-Cu-N2      | 93.9                       | 93.27(11) |
| O39-Cu-N9      | 92                         | 85.41(10) |
| O39-Cu-O16-C17 | 76.7                       | 90.8(3)   |
| O39-Cu-N9-C10  | -89.1                      | -88.0(3)  |
| N9-N2-O25-O16  | 3.7                        | 1.72(12)  |

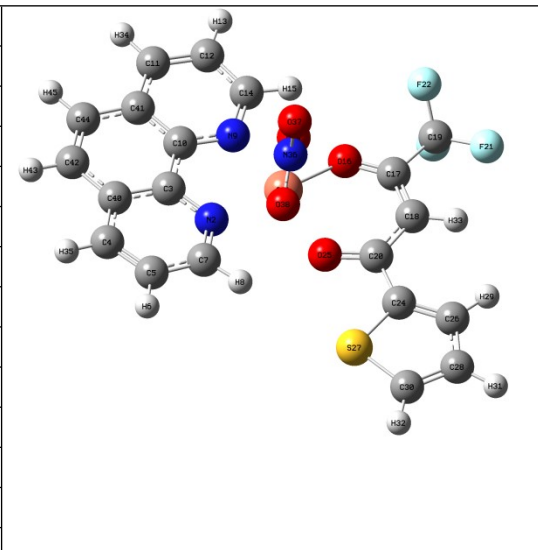

Note: O16 (opt)  $\equiv$  O1 (exp); O25 (opt)  $\equiv$  O2 (exp); O39 (opt)  $\equiv$  O3 (exp); N9 (opt)  $\equiv$  N2 (exp); N2 (opt)  $\equiv$  N1 (exp); C17 (opt)  $\equiv$  C17 (exp); C10 (opt)  $\equiv$  C6 (exp)

**Table S3: Selected optimized and experimental geometric parameters for Cu(TTA)BipyNO<sub>3</sub> at the PBE1PBE/6-311g(d,p) level of theory displayed in Figure 6, in the main article**

|                | Cu(TTA)bipyNO <sub>3</sub> |            |
|----------------|----------------------------|------------|
|                | Opt                        | Exp        |
| Cu1-O41        | 2.13                       | 2.280(7)   |
| Cu1-O16        | 1.94                       | 1.926(4)   |
| Cu1-O25        | 1.95                       | 1.918(4)   |
| Cu1-N2         | 2                          | 1.978(4)   |
| Cu1-N9         | 1.99                       | 1.975(4)   |
| O41-Cu-O16     | 95.9                       | 89.87(16)  |
| O41-Cu-O25     | 93.1                       | 105.95(15) |
| O41-Cu-N2      | 96.9                       | 95.92(17)  |
| O41-Cu-N9      | 94.8                       | 88.03(17)  |
| O41-Cu-O16-C17 | 72.2                       | 95.9(4)    |
| O41-Cu-N9-C10  | -85.9                      | -93.5(4)   |
| N9-N2-O25-O16  | -3.5                       | 4.98(17)   |

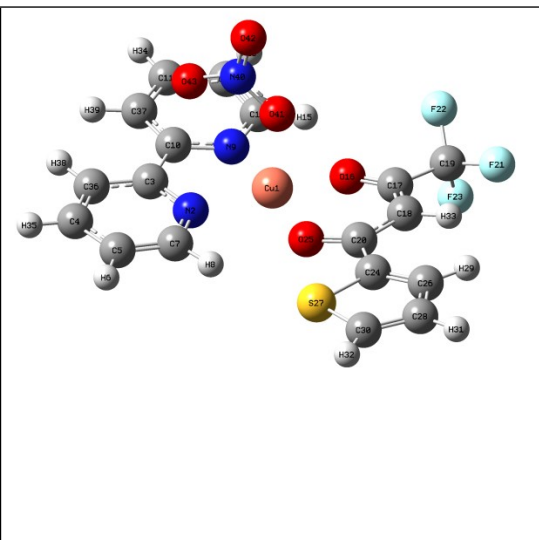

Note: O16 (opt)  $\equiv$  O2 (exp); O25 (opt)  $\equiv$  O1 (exp); O41 (opt)  $\equiv$  O3 (exp); N9 (opt)  $\equiv$  N1 (exp); N2 (opt)  $\equiv$  N2 (exp); C17 (opt)  $\equiv$  C14 (exp); C10 (opt)  $\equiv$  C5 (exp)

**Table S4: Selected optimized and experimental geometric parameters for Cu(TTA)tmenCl at the PBE1PBE/6-311g(d,p) level of theory displayed in Figure 6, in the main article.**

|        | Cu(TTA)tmenCl |           |
|--------|---------------|-----------|
|        | Opt           | Exp       |
| Cu1-Cl | 2.48          | 2.5048(5) |
| Cu1-O8 | 1.93          | 1.939(1)  |
| Cu1-O7 | 1.99          | 1.963(1)  |

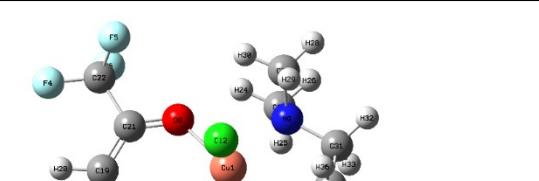

|              |       |           |
|--------------|-------|-----------|
| Cu1-N9       | 2.09  | 2.075(1)  |
| Cu1-N10      | 2.03  | 2.038(2)  |
| Cl-Cu-N9     | 101.9 | 102.21(4) |
| Cl-Cu-N10    | 94.1  | 97.68(4)  |
| Cl-Cu-O7     | 102.2 | 101.41(4) |
| Cl-Cu-O8     | 97.8  | 95.59(4)  |
| Cl-Cu-O8-C21 | 77.6  | -106.1(1) |
| Cl-Cu-N9-C31 | 89.1  | 98.42(9)  |
| O8-O7-N10-N9 | -9    | -7.54(5)  |

Note: O7 (opt)  $\equiv$  O1 (exp); O8 (opt)  $\equiv$  O2 (exp); N9 (opt)  $\equiv$  N1 (exp); N10 (opt)  $\equiv$  N2 (exp); C21 (opt)  $\equiv$  C7 (exp); C31 (opt)  $\equiv$  C11 (exp)

**Table S54: Selected optimized and experimental geometric parameters for Cu(TTA)tmenNO<sub>3</sub> at the PBE1PBE/6-311g(d,p) level of theory displayed in Figure 6, in the main article**

|               | Cu(TTA)tmenNO <sub>3</sub> |           |
|---------------|----------------------------|-----------|
|               | Opt                        | Exp       |
| Cu1-O8        | 2.15                       | 2.606(2)  |
| Cu1-O7        | 1.93                       | 1.929(1)  |
| Cu1-O6        | 1.98                       | 1.922(1)  |
| Cu1-N12       | 2.05                       | 2.031(2)  |
| Cu1-N11       | 2.02                       | 2.019(2)  |
| O8-Cu-O7      | 88.5                       | 84.75(6)  |
| O8-Cu-O6      | 90.6                       | 88.84(6)  |
| O8-Cu-N12     | 109                        | 98.20(6)  |
| O8-Cu-N11     | 100.8                      | 92.52(6)  |
| O8-Cu-O7-C24  | 70                         | 88.0(2)   |
| O8-Cu-N12-C37 | 103.9                      | -103.2(1) |
| N11-N12-O7-O6 | 7.9                        | 6.99(6)   |

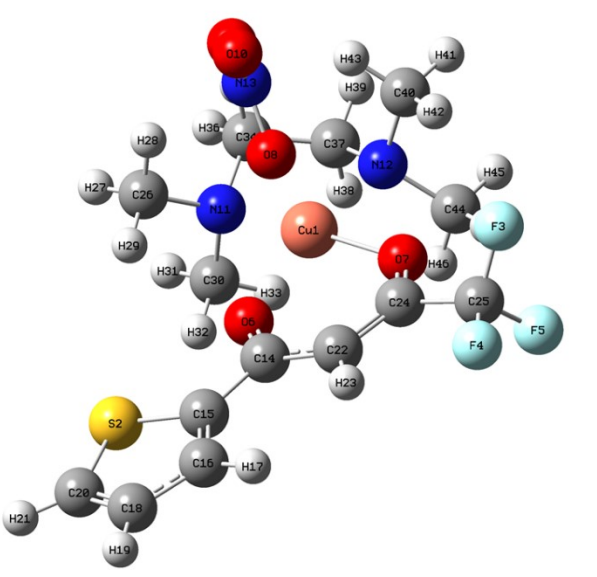

Note: O6 (opt)  $\equiv$  O2 (exp); O7 (opt)  $\equiv$  O1 (exp); O8 (opt)  $\equiv$  O5 (exp); N11 (opt)  $\equiv$  N2 (exp); N12 (opt)  $\equiv$  N1 (exp); C24 (opt)  $\equiv$  C1 (exp); C37 (opt)  $\equiv$  C11 (exp)

**Table S6: Selected optimized and experimental geometric parameters for Cu(TTA)<sub>2</sub>tmen at the PBE1PBE/6-311g(d,p) level of theory displayed in Figure 6, in the main article.**

|         | Cu(TTA) <sub>2</sub> tmen |          |
|---------|---------------------------|----------|
|         | Opt                       | Exp      |
| Cu1 O4  | 2.25                      | 2.292(1) |
| Cu1-O44 | 2.3                       | 2.281(1) |
| Cu1-O13 | 1.98                      | 1.960(1) |
| Cu1-O52 | 1.98                      | 1.990(1) |
| Cu1-N22 | 2.07                      | 2.061(2) |
| Cu1-N23 | 2.06                      | 2.056(2) |

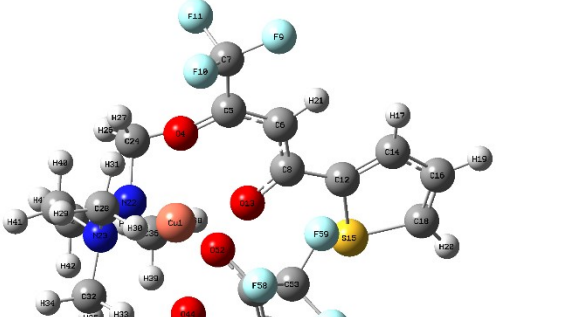

|            |       |          |
|------------|-------|----------|
| O4-Cu-O44  | 169.4 | 167.2(1) |
| O4-Cu1-O13 | 83.6  | 84.74(6) |
| O4-Cu1-O52 | 90.4  | 86.07(5) |
| O4-Cu1-N22 | 94.8  | 99.69(6) |
| O4-Cu1-N23 | 91.3  | 93.00(6) |

Note: O4 (opt)  $\equiv$  O3 (exp); O13 (opt)  $\equiv$  O4 (exp); O44 (opt)  $\equiv$  O2 (exp); O52 (opt)  $\equiv$  O1 (exp); N22 (opt)  $\equiv$  N2 (exp); N23 (opt)  $\equiv$  N1 (exp)

**Table S7: Selected optimized and experimental geometric parameters for Cu(TTA)BipyCl at the PBE1PBE/6-311g(d,p) level of theory displayed in Figure 6, in the main article.**

|               | Cu(TTA)bipyCl |           |
|---------------|---------------|-----------|
|               | Opt           | Exp       |
| Cu1-Cl        | 2.43          | 2.471(1)  |
| Cu1-O16       | 1.95          | 1.948(2)  |
| Cu1-O25       | 1.94          | 1.946(2)  |
| Cu1-N9        | 2.00          | 1.999(2)  |
| Cu1-N2        | 2.02          | 2.010(2)  |
| Cl-Cu-O16     | 105.2         | 97.18(5)  |
| Cl-Cu-O25     | 99.4          | 97.77(5)  |
| Cl-Cu-N9      | 92.7          | 99.83(6)  |
| Cl-Cu-N2      | 94.7          | 101.08(5) |
| N9-N2-O25-O16 | 5.7           | -0.61(6)  |
| Cl-Cu-O16-O25 | 99.9          | 98.15(5)  |
| Cl-Cu-N9-N2   | 94.3          | -99.78(5) |
| Cl-Cu-N2-C3   | 84.8          | 97.71(13) |
| Cl-Cu-O16-C20 | 78.8          | 93.44(14) |

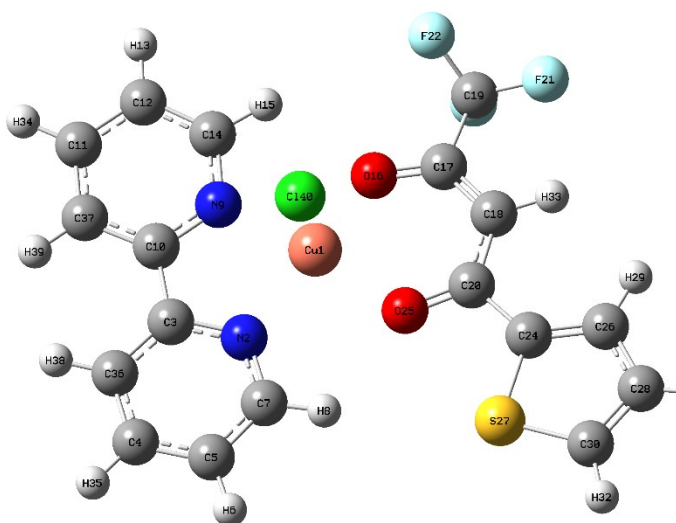

Note: O16 (opt)  $\equiv$  O1 (exp); O25 (opt)  $\equiv$  O2 (exp); N9 (opt)  $\equiv$  N1 (exp); N2 (opt)  $\equiv$  N2 (exp)



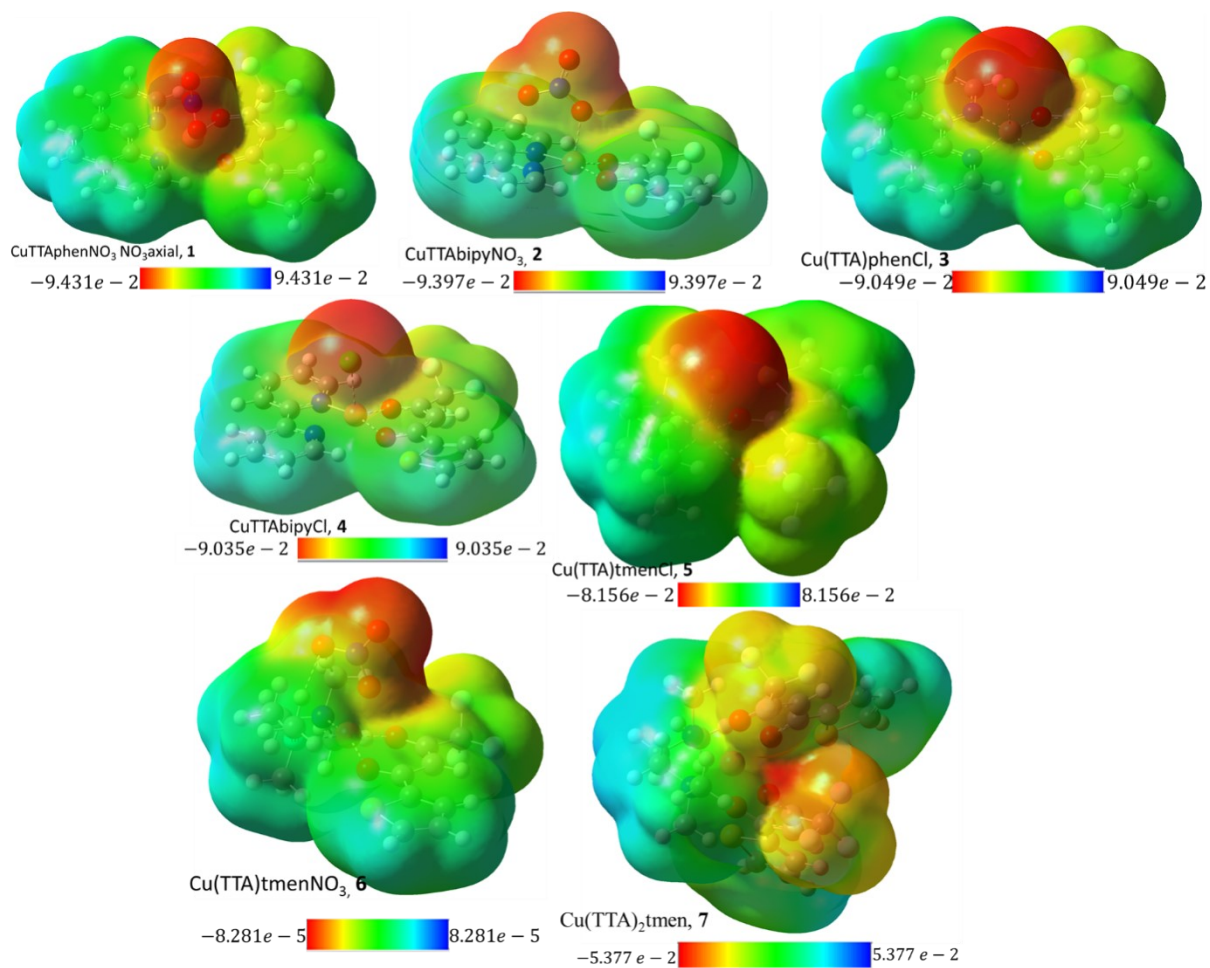

Figure S3: Electrostatic potential surfaces of the copper complexes at the PBE1PBE/6-311g(d,p) level of theory.

## Hirshfeld Analysis

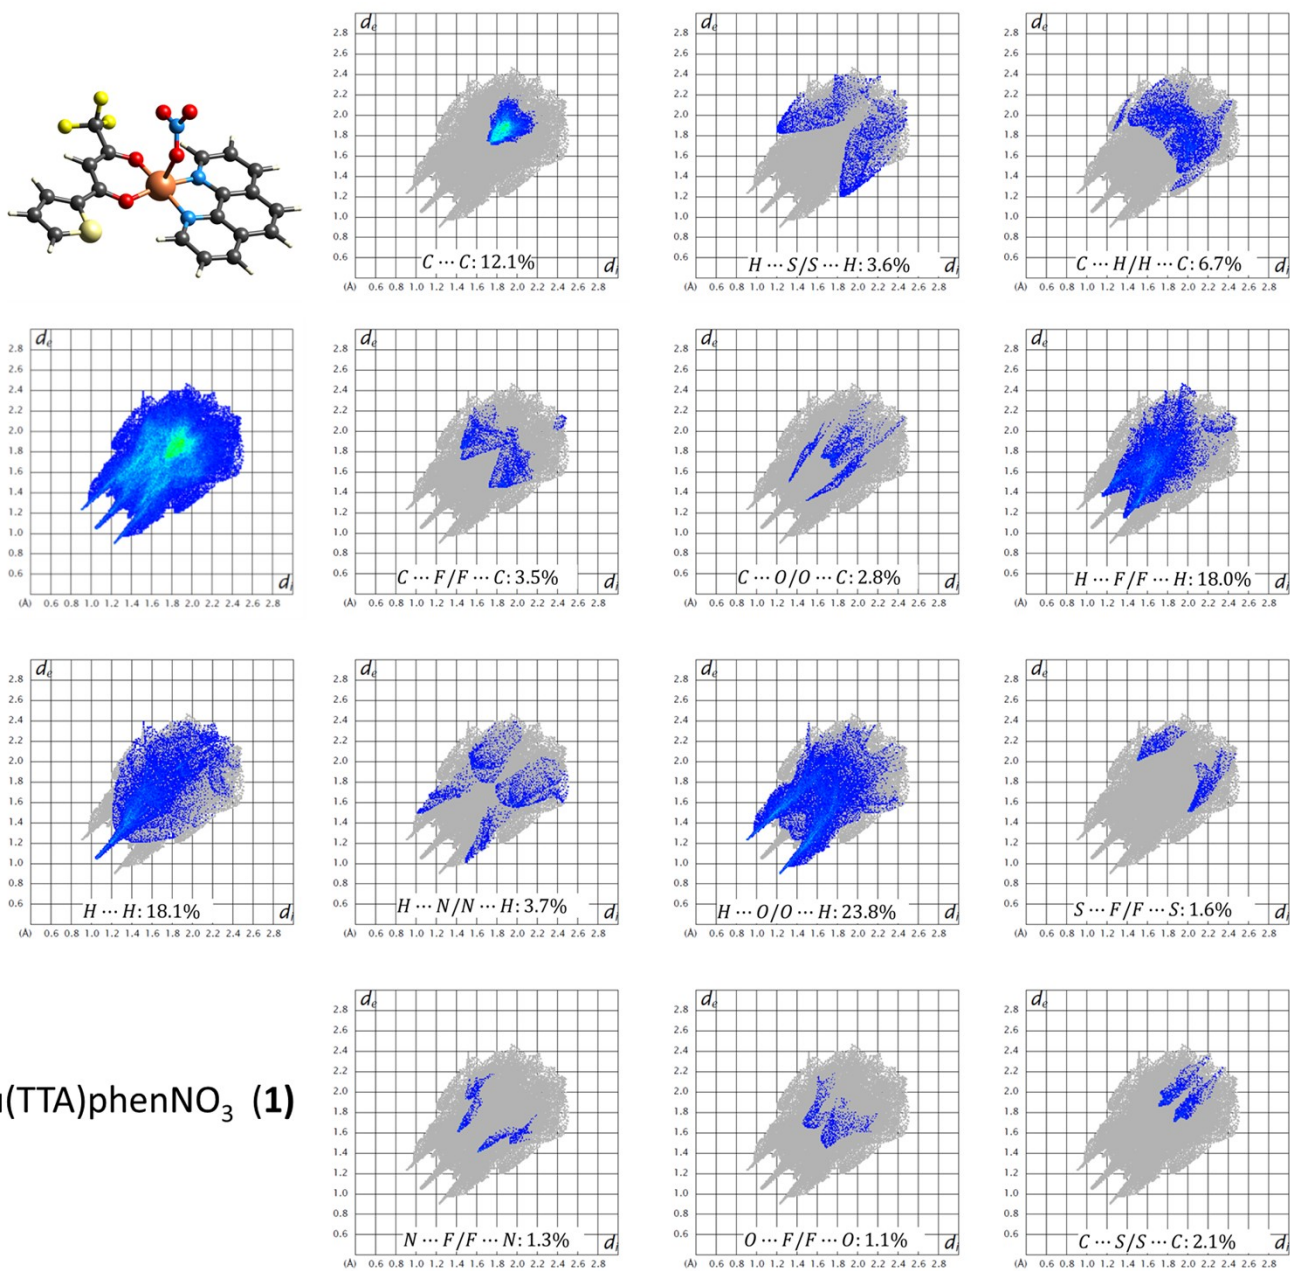

**Figure S4: Fingerprint plots for CuTTA phenNO<sub>3</sub>, 1. The main interactions are  $H \cdots O/O \cdots H$ :23.8%,  $H \cdots H$ : 18.1%,  $H \cdots F/F \cdots H$ : 18.0%,  $C \cdots C$ :12.1%, other significant interactions are  $H \cdots C/H \cdots C$ : 6.7%,  $H \cdots N/N \cdots H$ : 3.7% (close contact),  $C \cdots O/O \cdots C$ :2.84%,  $C \cdots S/S \cdots C$ :2.1%,  $O \cdots N/N \cdots O$ : 1.3%, and  $F \cdots O/O \cdots F$ :1.1%.**

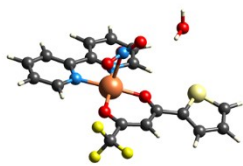

Cu(TTA)BipyNO<sub>3</sub> (2)

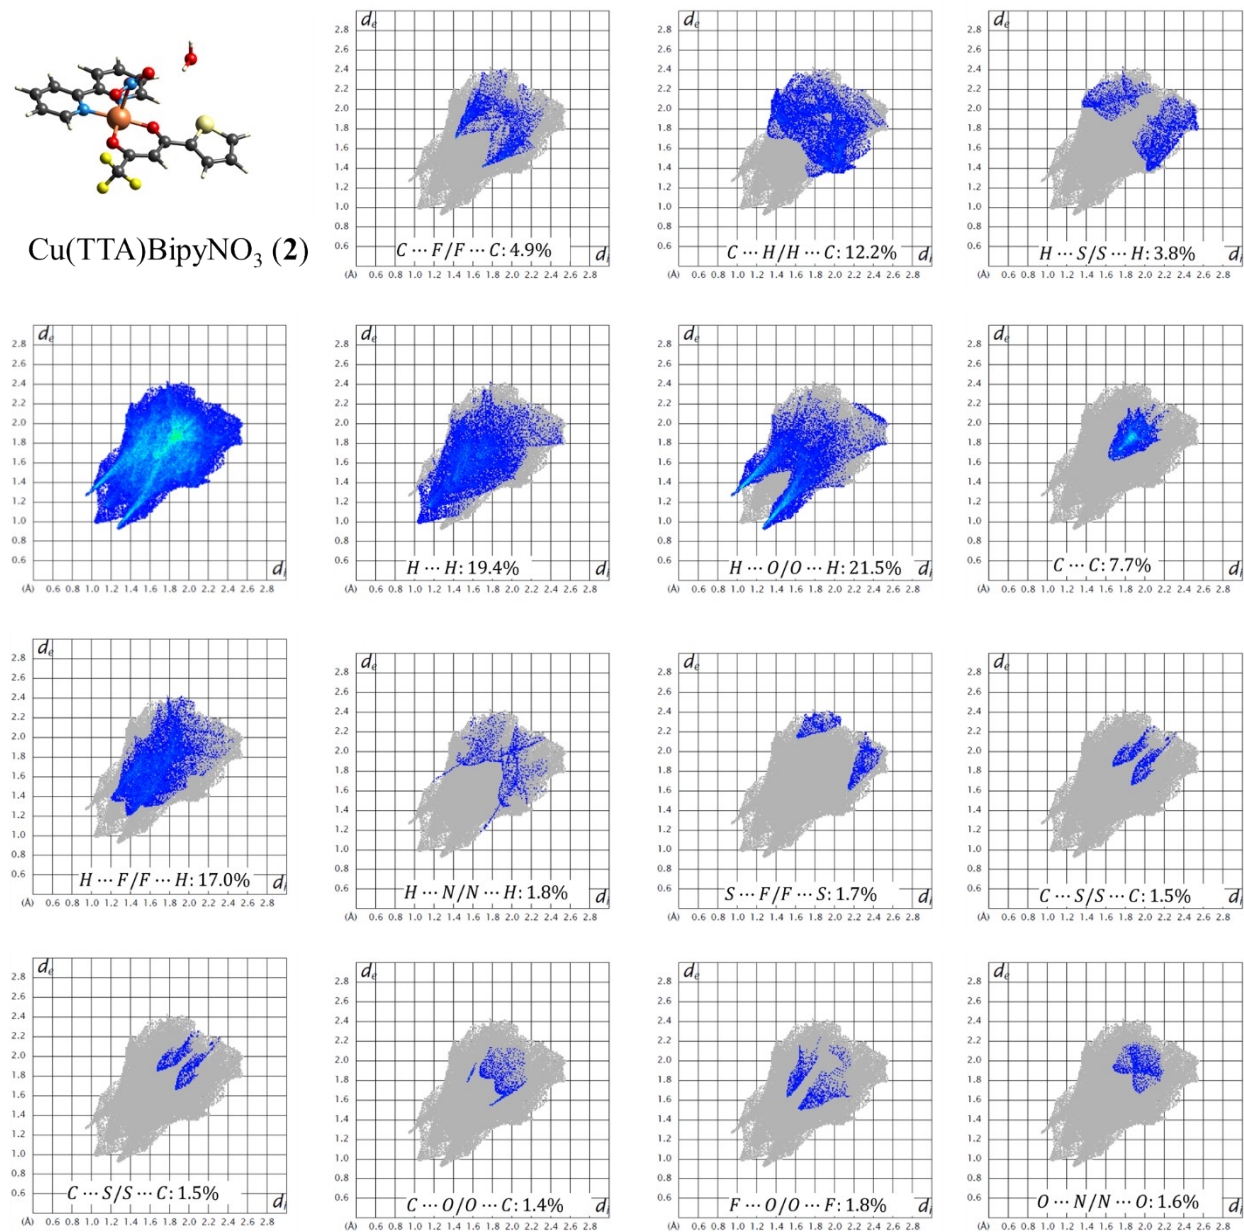

**Figure S5: Fingerprint plots for Cu (TTA) bipyNO<sub>3</sub>, 2. The main interactions are  $H\cdots O/O\cdots H$ : 21.5%,  $H\cdots H$ : 19.4%,  $H\cdots F/F\cdots H$ : 17.0%,  $H\cdots C/C\cdots H$ : 12.2%,  $C\cdots C$  contribution of 7.7% indicates a reasonable amount of  $\pi\cdots\pi$  stacking; other significant interactions are  $C\cdots F/F\cdots C$ : 4.9%,  $H\cdots S/S\cdots H$ : 3.8%, and others are  $S\cdots F/F\cdots S$ : 1.7%,  $H\cdots N/N\cdots H$ : 1.8%,  $C\cdots S/S\cdots C$ : 1.5%,  $C\cdots O/O\cdots C$ : 1.4%,  $F\cdots O/O\cdots F$ : 1.8%, and  $O\cdots N/N\cdots O$ : 1.6%.**

∴

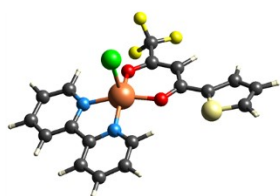

Cu(TTA)BipyCl (**4**)

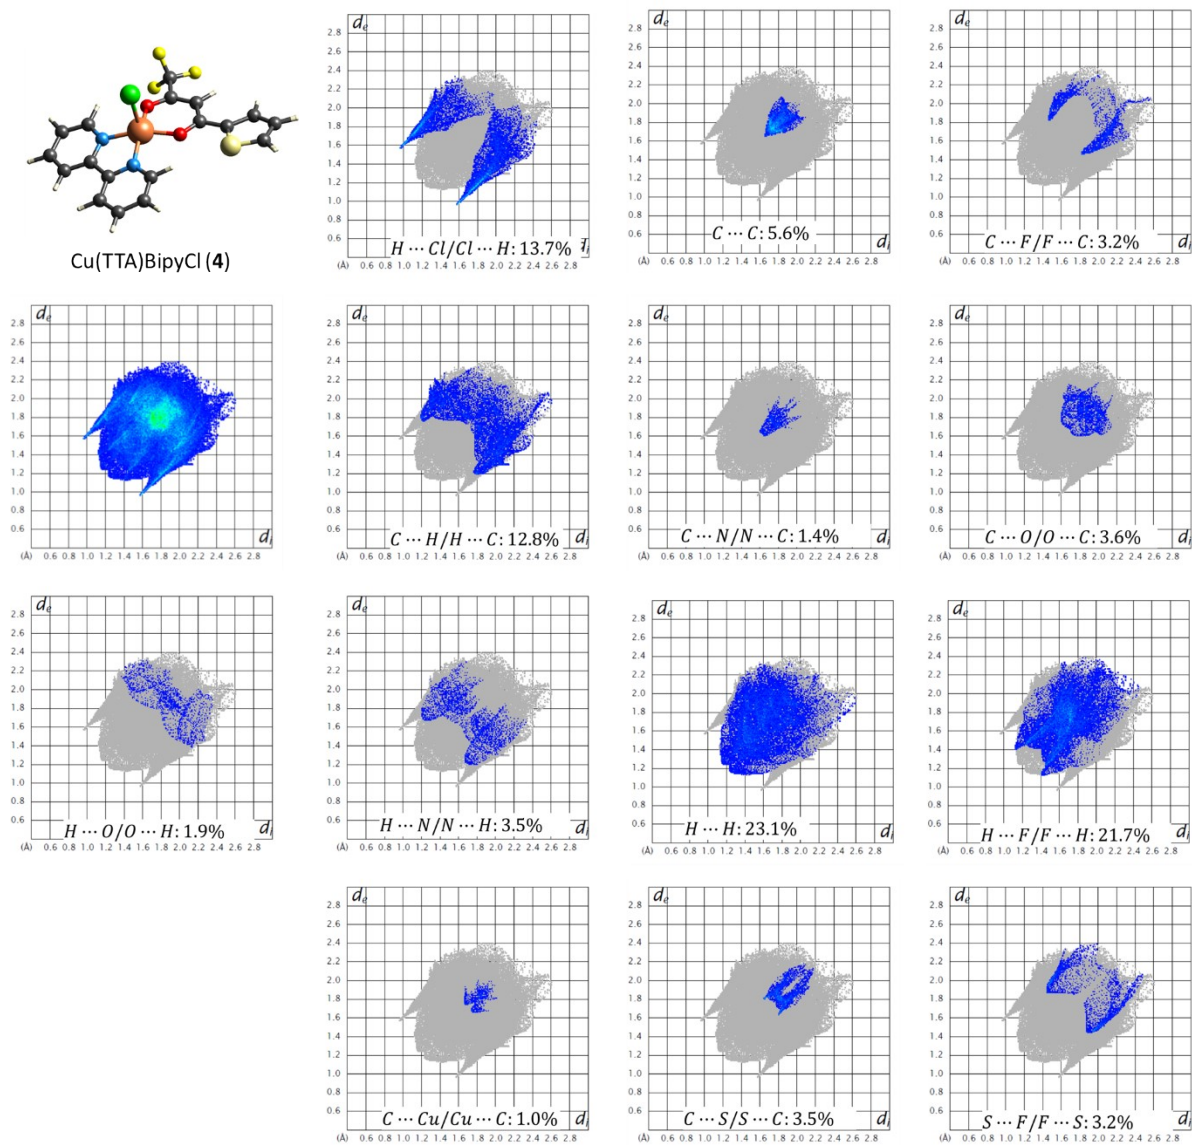

**Figure S6: Fingerprint plots for Cu(TTA)bipyCl, **4**. The main interactions are  $H \cdots F/F \cdots H$ : 21.7%,  $H \cdots H$ : 23.1%,  $H \cdots C/C \cdots H$ : 12.8%,  $H \cdots Cl/Cl \cdots H$ : 13.7%;  $C \cdots C$ : 5.6% from  $\pi \cdots \pi$  stacking. Other significant interactions are  $C \cdots O/O \cdots C$ : 3.6%,  $H \cdots N/N \cdots H$ : 3.5%;  $C \cdots S/S \cdots C$ : 3.5%;  $C \cdots F/F \cdots C$ : 3.2%,  $S \cdots F/F \cdots S$ : 3.2%, and others are  $H \cdots O/O \cdots H$ : 1.9%,  $C \cdots N/N \cdots C$ : 1.4%, and  $Cu \cdots C/C \cdots Cu$ : 1.0%.**

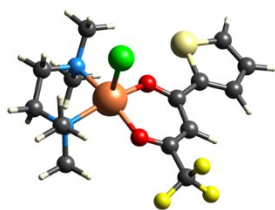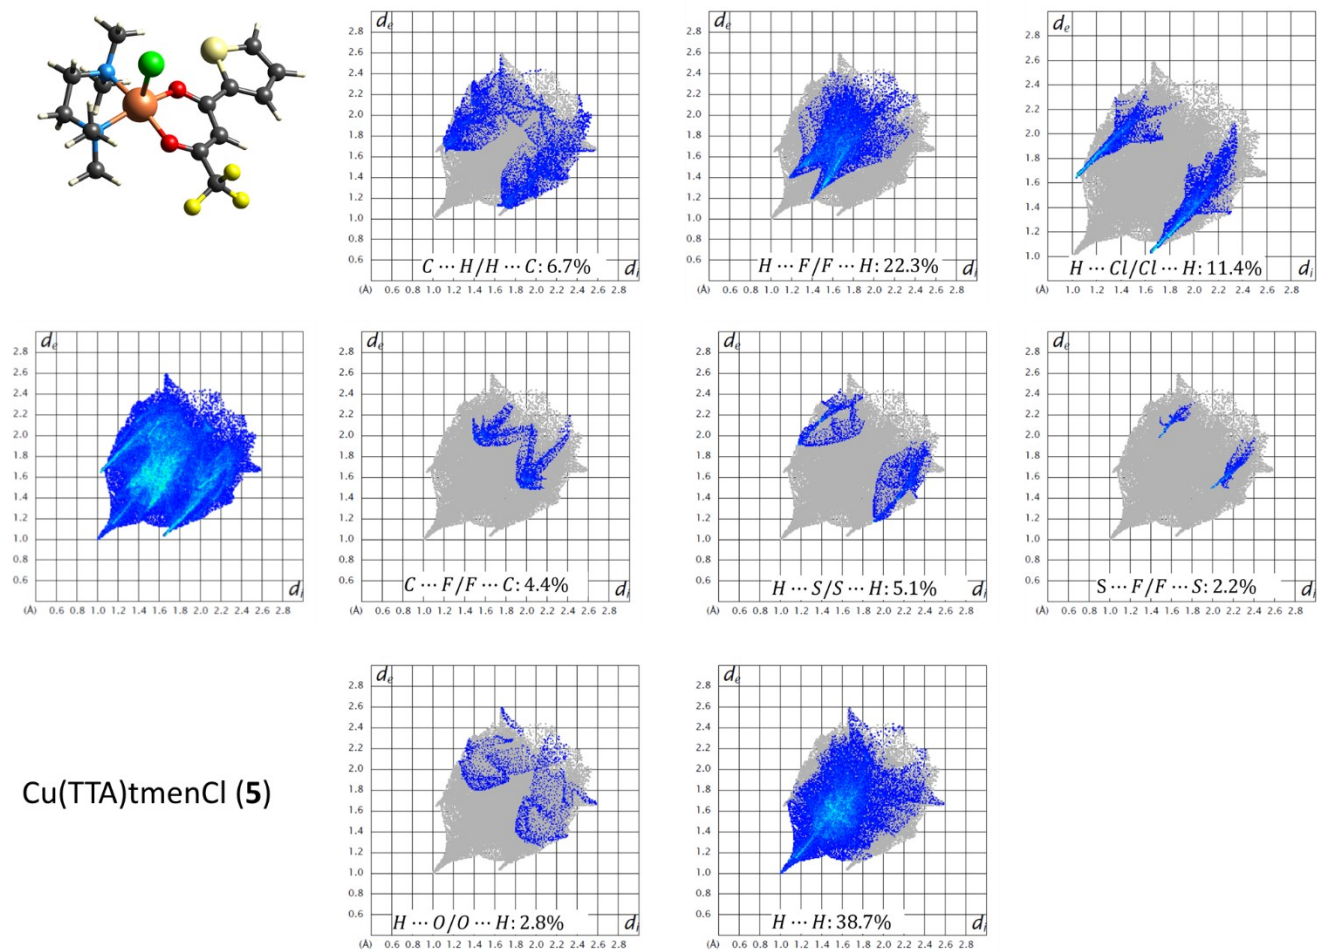

Cu(TTA)tmenCl (5)

**Figure S7: Fingerprint plots for Cu(TTA)tmenCl, 5. The main interactions are  $H \cdots F/F \cdots H$ : 22.3%,  $H \cdots H$ : 38.7% and  $H \cdots Cl/Cl \cdots H$ : 11.4%. Other significant interactions are  $H \cdots C/C \cdots H$ : 6.7%,  $H \cdots S/S \cdots H$ : 5.1%,  $C \cdots F/F \cdots C$ : 4.4%,  $H \cdots O/O \cdots H$ : 2.8%, and  $S \cdots F/F \cdots S$ : 2.2%.**

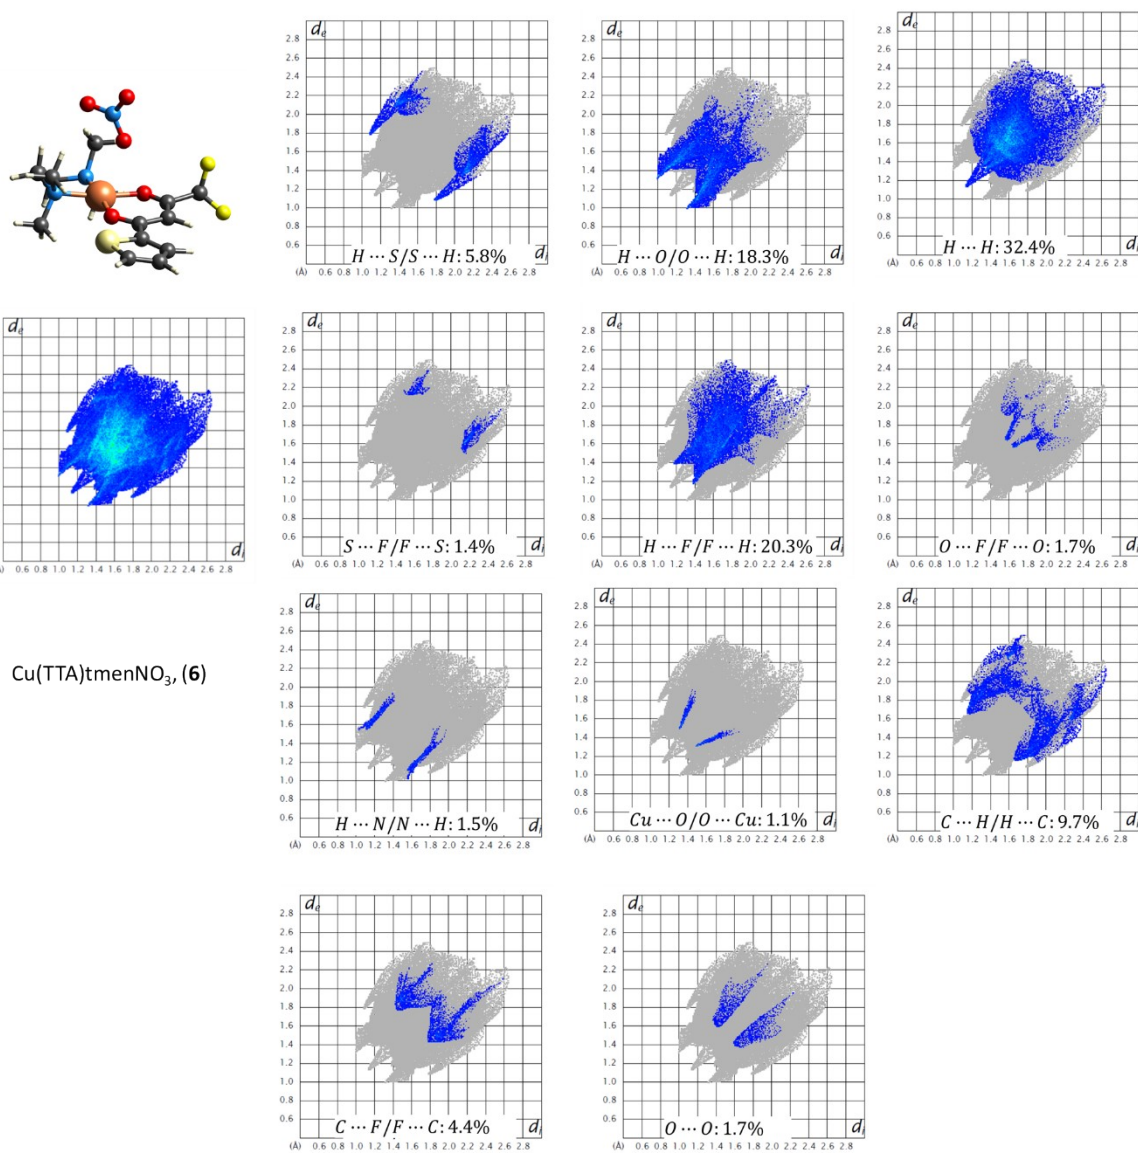

**Figure S8: Fingerprint plots for  $\text{CuTTAtmenNO}_3$ , 6. The main interactions are  $\text{H}\cdots\text{H}$ : 32.4%;  $\text{H}\cdots\text{F}/\text{F}\cdots\text{H}$ : 20.3%,  $\text{H}\cdots\text{O}/\text{O}\cdots\text{H}$ : 18.3%, and  $\text{C}\cdots\text{H}/\text{H}\cdots\text{C}$ : 9.7%; other significant interactions are  $\text{C}\cdots\text{F}/\text{F}\cdots\text{C}$ : 4.4%,  $\text{H}\cdots\text{S}/\text{S}\cdots\text{H}$ : 5.8%; and others are  $\text{S}\cdots\text{F}/\text{F}\cdots\text{S}$ : 1.4%,  $\text{H}\cdots\text{N}/\text{N}\cdots\text{H}$ : 1.5%,  $\text{Cu}\cdots\text{O}/\text{O}\cdots\text{Cu}$ : 1.1%,  $\text{O}\cdots\text{F}/\text{F}\cdots\text{O}$ : 1.7%, and  $\text{O}\cdots\text{O}$ : 1.7%.**

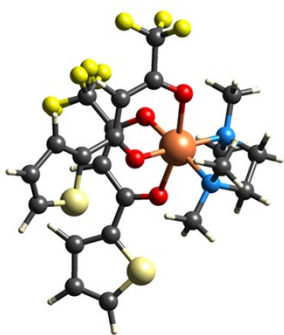

Cu(TTA)<sub>2</sub>tmen, (7)

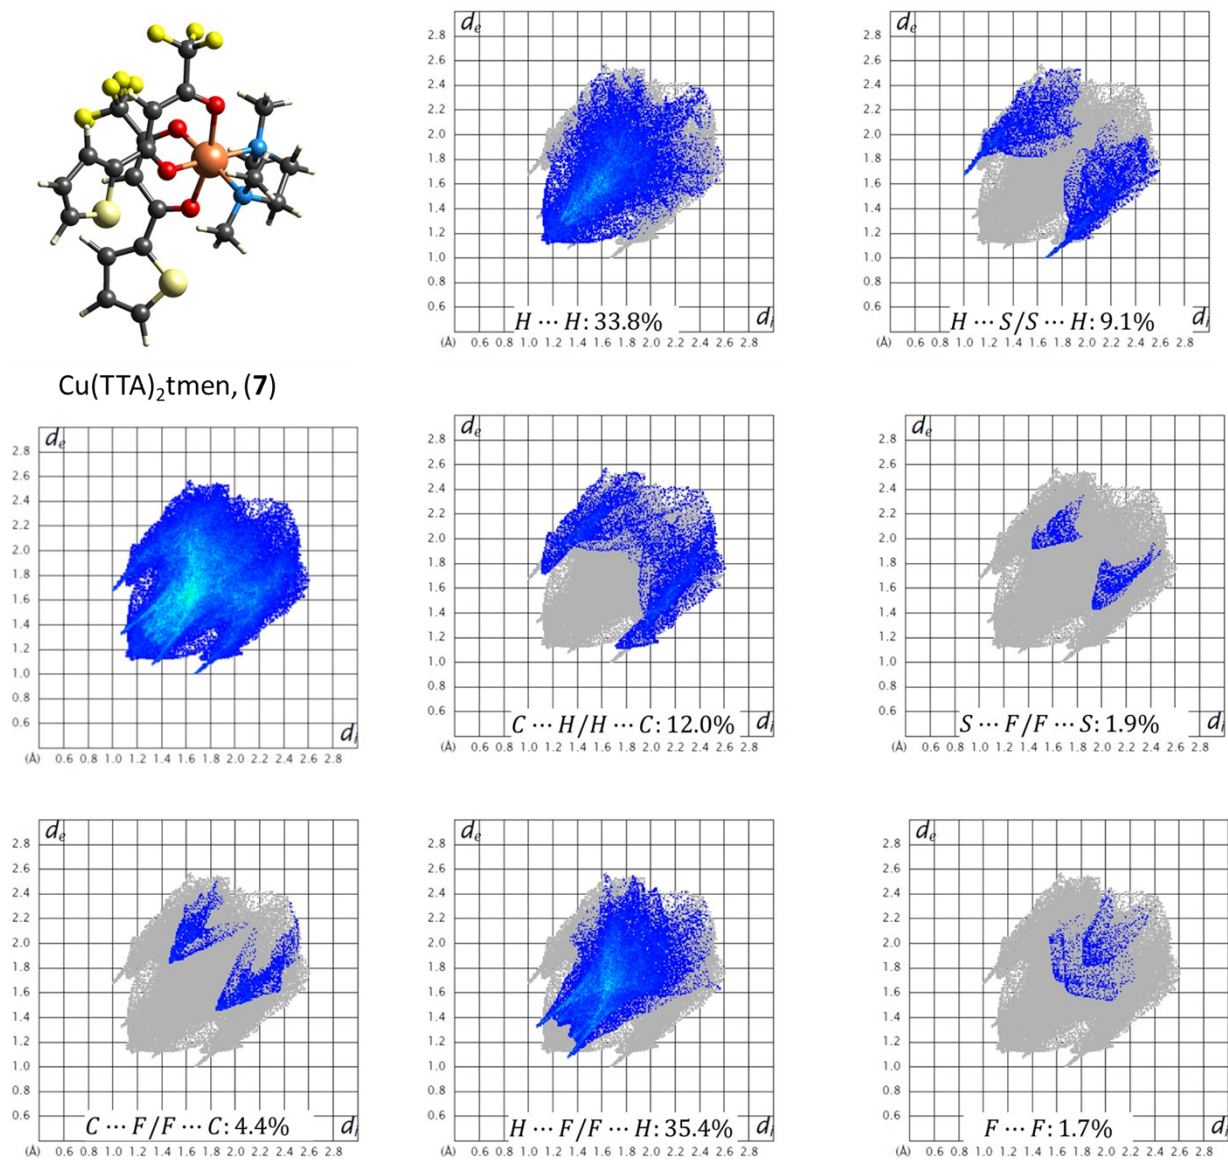

**Figure S9: Fingerprint plots for Cu(TTA)<sub>2</sub>tmen, 7. The main interactions are  $H \cdots H$  : 33.8%,  $H \cdots F/F \cdots H$ : 35.4%,  $H \cdots C/C \cdots H$ : 12.0%. Others are  $H \cdots S/S \cdots H$ : 9.1%,  $C \cdots F/F \cdots C$ : 4.4% and  $F \cdots F$  : 1.7%**

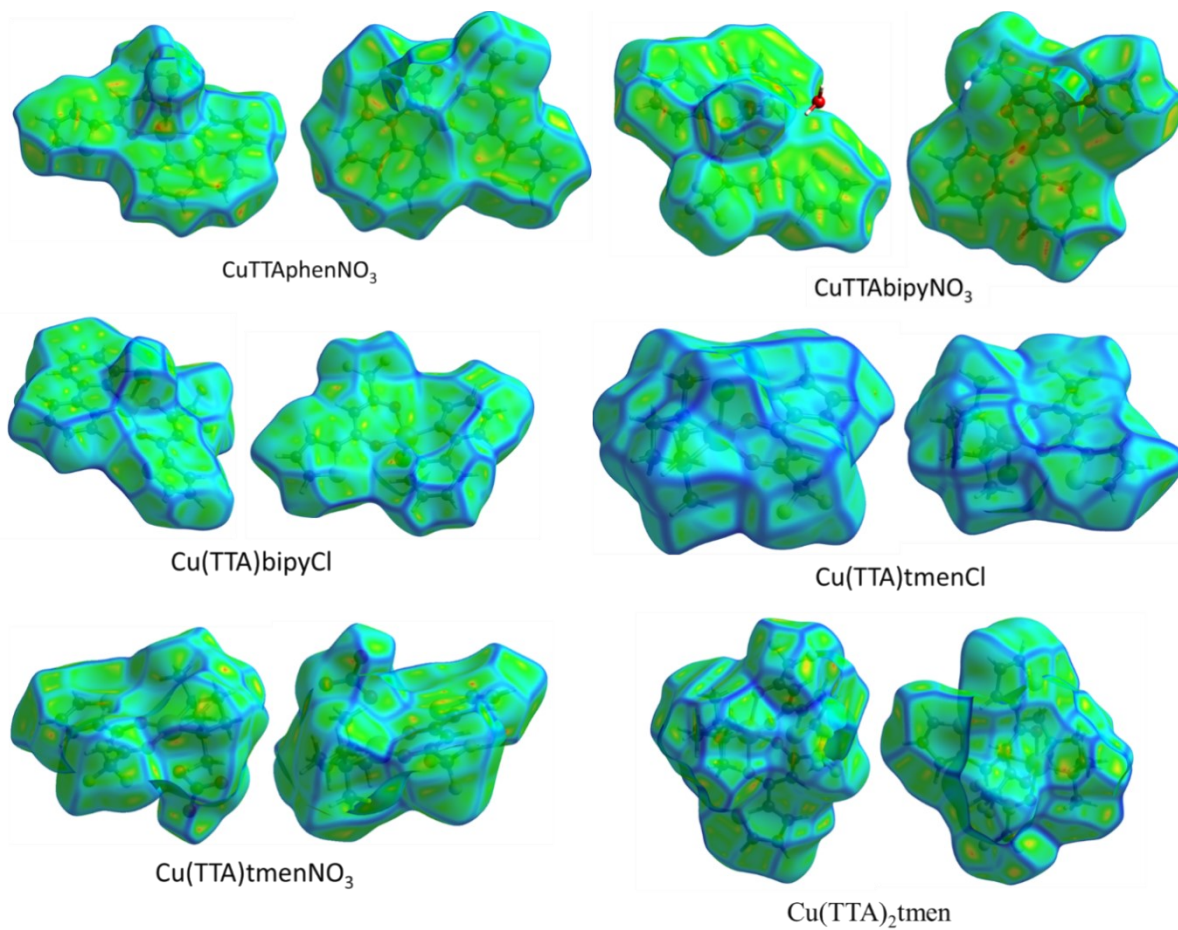

**Figure S10: Hirshfeld surface mapped over curvedness property.**



Table S8: Summary of the various interactions (in %) in the crystal of the complexes.

|               | <b>CuTTA<br/>Phen<br/>NO<sub>3</sub></b> | <b>CuTTA<br/>bipyNO<sub>3</sub></b> | <b>CuTTA<br/>bipyCl</b> | <b>CuTTA<br/>tmenCl</b> | <b>CuTTA<br/>tmenNO<sub>3</sub></b> | <b>CuTTA<sub>2</sub><br/>tmen</b> |
|---------------|------------------------------------------|-------------------------------------|-------------------------|-------------------------|-------------------------------------|-----------------------------------|
| <b>Cu...O</b> |                                          | 0.2                                 |                         |                         | 1.1                                 |                                   |
| <b>Cu...H</b> | 1.0                                      |                                     | 0.1                     |                         |                                     |                                   |
| <b>Cu...N</b> |                                          | 0.1                                 |                         |                         |                                     |                                   |
| <b>Cu...C</b> |                                          |                                     | 1.0                     |                         |                                     |                                   |
| <b>H...S</b>  | 3.6                                      | 3.8                                 |                         | 5.1                     | 5.8                                 | 9.1                               |
| <b>H...F</b>  | 18.0                                     | 17.0                                | 21.7                    | 22.3                    | 20.3                                | 35.4                              |
| <b>H...O</b>  | 23.8                                     | 21.5                                | 1.9                     | 2.8                     | 18.3                                | 0.9                               |
| <b>H...N</b>  | 3.7                                      | 1.8                                 | 3.5                     |                         | 1.5                                 |                                   |
| <b>H...C</b>  | 6.7                                      | 12.2                                | 12.8                    | 11.5                    | 9.7                                 | 12.0                              |
| <b>S...F</b>  | 1.6                                      | 1.7                                 | 3.2                     | 2.2                     | 1.4                                 | 1.9                               |
| <b>S...S</b>  |                                          |                                     | 0.2                     |                         |                                     |                                   |
| <b>H...H</b>  | 18.1                                     | 19.4                                | 23.1                    | 38.7                    | 32.4                                | 33.8                              |
| <b>C...S</b>  | 2.1                                      | 1.5                                 | 3.5                     |                         |                                     | 0.7                               |
| <b>C...F</b>  | 3.5                                      | 4.9                                 | 3.2                     | 4.4                     | 4.4                                 | 4.4                               |
| <b>C...O</b>  | 2.8                                      | 1.4                                 | 3.6                     |                         | 0.4                                 |                                   |
| <b>C...C</b>  | 12.1                                     | 7.7                                 | 5.6                     | 0.7                     | 0.8                                 | 0.1                               |
| <b>C...N</b>  | 0.4                                      | 0.7                                 | 1.4                     |                         |                                     |                                   |
| <b>F...F</b>  |                                          | 0.2                                 | 0.7                     | 0.6                     | 0.6                                 | 1.7                               |
| <b>F...O</b>  | 1.1                                      | 1.8                                 |                         | 0.1                     | 1.7                                 |                                   |
| <b>F...N</b>  | 1.3                                      | 1.0                                 |                         |                         |                                     |                                   |
| <b>O...O</b>  | 0.1                                      | 0.7                                 |                         |                         | 1.7                                 |                                   |
| <b>O...N</b>  | 0.1                                      | 1.6                                 |                         |                         |                                     |                                   |
| <b>O...S</b>  |                                          | 0.2                                 | 0.5                     |                         |                                     |                                   |
| <b>N...N</b>  |                                          | 0.2                                 |                         |                         |                                     |                                   |
| <b>N...S</b>  |                                          |                                     |                         |                         |                                     |                                   |
| <b>H...Cl</b> |                                          | 0.2                                 | 13.7                    | 11.4                    |                                     |                                   |
| <b>Cl...C</b> |                                          |                                     | 0.4                     |                         |                                     |                                   |
| <b>Cl...F</b> |                                          |                                     |                         | 0.2                     |                                     |                                   |

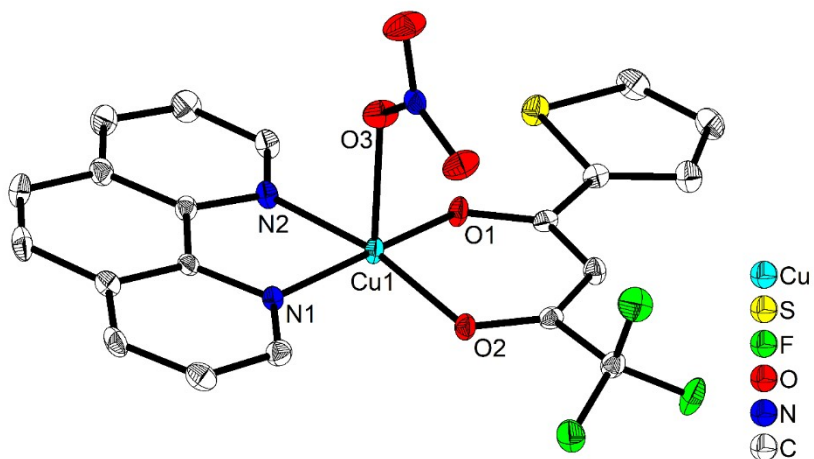

**Fig. S11: Solid-state molecular structure of [Cu(TTA)phenNO<sub>3</sub>] (1) determined by single-crystal X-ray diffraction at 100 K. All ellipsoids are drawn at the 50% probability level, and H atoms are omitted for clarity.**

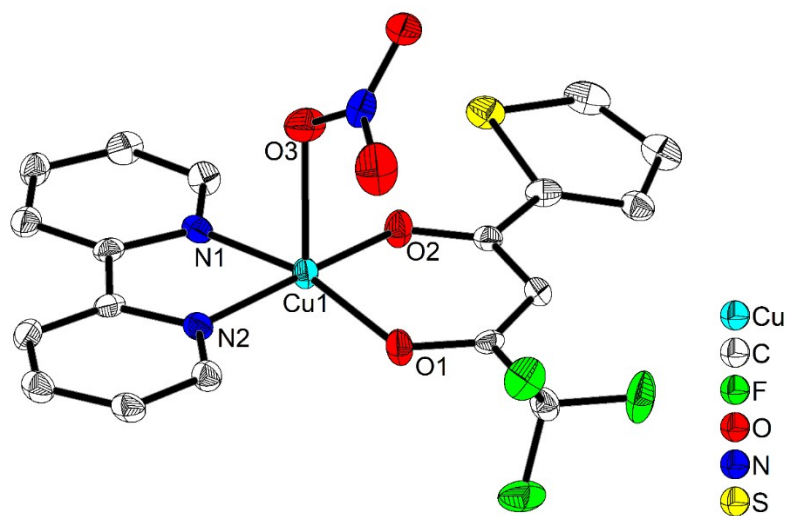

**Fig. S12: Solid-state molecular structure of [Cu(TTA)bipyNO<sub>3</sub>] (2) determined by single-crystal X-ray diffraction at 100 K. All ellipsoids are drawn at the 50% probability level, and H atoms as well as water solvent molecules are omitted for clarity.**

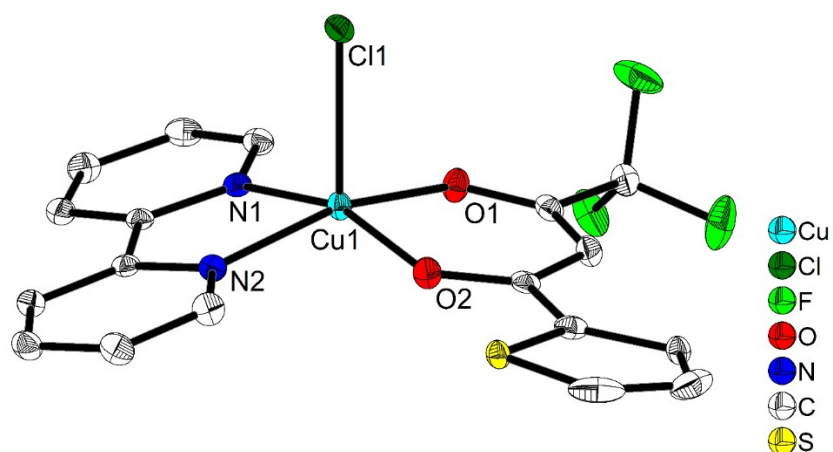

**Fig. S13: Solid-state molecular structure of [Cu(TTA)bipyCl] (4) determined by single-crystal X-ray diffraction at 100 K. All ellipsoids are drawn at the 50% probability level, and H atoms are omitted for clarity. The thienyl and trifluoromethyl groups are disordered and only the major parts with 78% occupancy are shown here.**

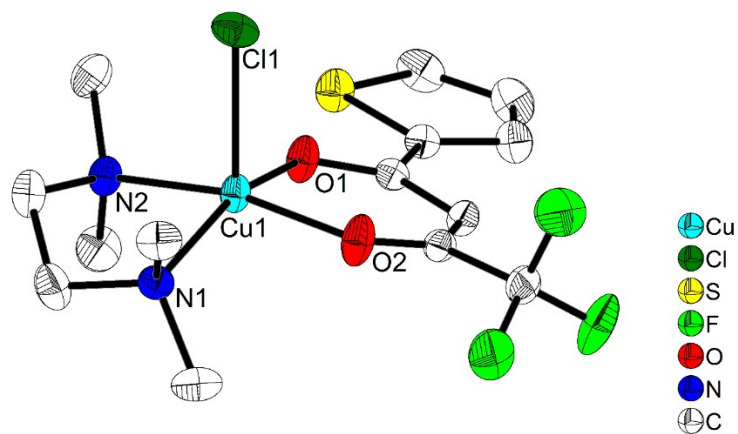

**Fig. S14: Solid-state molecular structure of [Cu(TTA)tmenCl] (5) determined by single-crystal X-ray diffraction at 100 K. All ellipsoids are drawn at the 50% probability level, and H atoms are omitted for clarity.**

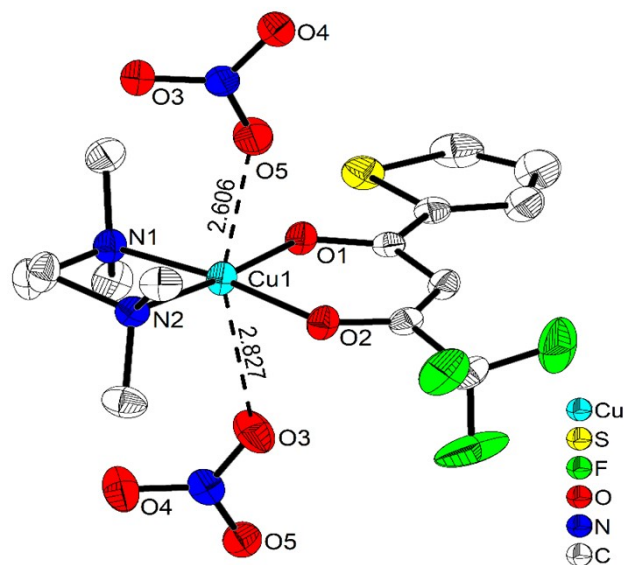

Fig. S15: Solid-state molecular structure of  $[\text{Cu}(\text{TTA})\text{tmenNO}_3]$  (6) determined by single-crystal X-ray diffraction at 100 K. All ellipsoids are drawn at the 50% probability level, and H atoms are omitted for clarity. Two nitrate anions are drawn in order to show the coordination geometry around the central Cu atom. However, only one of the two anions is present in the asymmetric unit. Contact distances are given in Å.

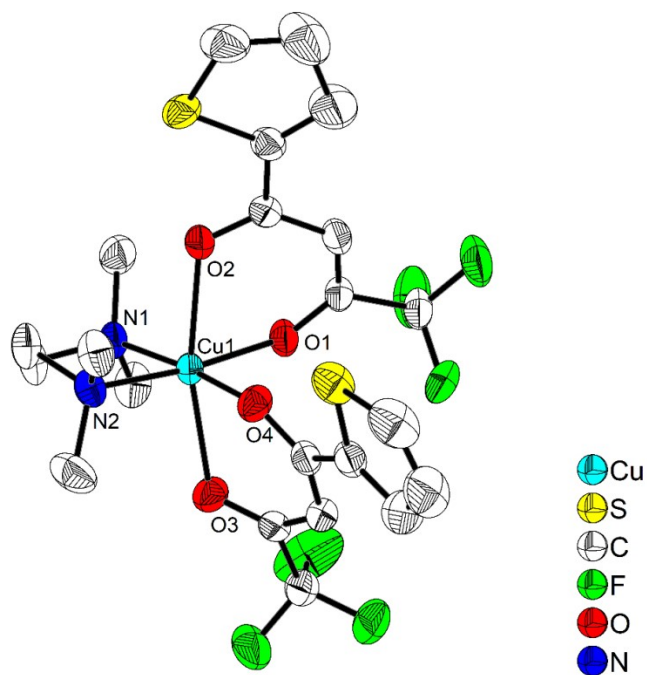

Fig. S16: Solid-state molecular structure of  $[\text{Cu}(\text{TTA})_2\text{tmen}]$  (7) determined by single-crystal X-ray diffraction at 100 K. All ellipsoids are drawn at the 50% probability level, and H atoms are omitted for clarity. The thienyl and trifluoromethyl groups are disordered and only the major parts with 65% and 50% occupancy, respectively, are shown here.

**Table S9: Single-crystal X-ray diffraction data and refinement details for 1,2, 4,5,6 and 7**

| Data                                                      | [Cu(TTA)phenNO <sub>3</sub> ]<br><b>1</b>                                        | [Cu(TTA)bipyNO <sub>3</sub> ]<br><b>2</b>                                        | [Cu(TTA)bipyCl]<br><b>4</b>                                                        |
|-----------------------------------------------------------|----------------------------------------------------------------------------------|----------------------------------------------------------------------------------|------------------------------------------------------------------------------------|
| CCDC number                                               | 2056492                                                                          | 2056493                                                                          | 2056494                                                                            |
| Empirical formula                                         | C <sub>20</sub> H <sub>12</sub> CuF <sub>3</sub> N <sub>3</sub> O <sub>5</sub> S | C <sub>18</sub> H <sub>14</sub> CuF <sub>3</sub> N <sub>3</sub> O <sub>6</sub> S | C <sub>18</sub> H <sub>12</sub> CuClF <sub>3</sub> N <sub>2</sub> O <sub>2</sub> S |
| Formula weight / g·mol <sup>-1</sup>                      | 526.94                                                                           | 520.92                                                                           | 476.35                                                                             |
| <i>T</i> / K                                              | 100(2)                                                                           | 100(2)                                                                           | 100(2)                                                                             |
| Radiation, $\lambda$ / Å                                  | Mo-K $\alpha$ 0.71073                                                            | Mo-K $\alpha$ 0.71073                                                            | Mo-K $\alpha$ 0.71073                                                              |
| Crystal size / mm <sup>3</sup>                            | 0.20×0.20×0.20                                                                   | 0.10×0.20×0.25                                                                   | 0.23×0.36×0.41                                                                     |
| Crystal colour, habit                                     | green block                                                                      | green block                                                                      | yellow block                                                                       |
| $\mu$ / mm <sup>-1</sup>                                  | 1.297                                                                            | 1.288                                                                            | 1.543                                                                              |
| Crystal system                                            | Triclinic                                                                        | Orthorhombic                                                                     | Monoclinic                                                                         |
| Space group                                               | <i>P</i> 1                                                                       | <i>F</i> dd2                                                                     | <i>P</i> 2 <sub>1</sub> / <i>c</i>                                                 |
| <i>a</i> / Å                                              | 7.6341(4)                                                                        | 27.42(7)                                                                         | 13.023(6)                                                                          |
| <i>b</i> / Å                                              | 7.7048(4)                                                                        | 27.513(18)                                                                       | 8.377(4)                                                                           |
| <i>c</i> / Å                                              | 9.5687(4)                                                                        | 10.435 (7)                                                                       | 17.040(7)                                                                          |
| $\alpha$ / °                                              | 95.380(2)                                                                        | 90                                                                               | 90                                                                                 |
| $\beta$ / °                                               | 108.445(2)                                                                       | 90                                                                               | 106.899(13)                                                                        |
| $\gamma$ / °                                              | 110.266(2)                                                                       | 90                                                                               | 90                                                                                 |
| Volume / Å <sup>3</sup>                                   | 487.61(4)                                                                        | 7872(23)                                                                         | 1778.7(14)                                                                         |
| <i>Z</i>                                                  | 1                                                                                | 16                                                                               | 4                                                                                  |
| $\rho_{\text{calc}}$ / g·cm <sup>-3</sup>                 | 1.794                                                                            | 1.758                                                                            | 1.779                                                                              |
| <i>F</i> (000)                                            | 265                                                                              | 4208                                                                             | 956                                                                                |
| $\theta$ range / °                                        | 2.305 – 26.992                                                                   | 2.215 – 26.773                                                                   | 1.634 – 26.000                                                                     |
| Reflections collected                                     | 10769                                                                            | 18494                                                                            | 64883                                                                              |
| Unique reflections                                        | 3411                                                                             | 4201                                                                             | 3500                                                                               |
| Parameters / restraints                                   | 298 / 3                                                                          | 296 / 5                                                                          | 283 / 58                                                                           |
| GooF on <i>F</i> <sup>2</sup>                             | 1.057                                                                            | 1.041                                                                            | 1.040                                                                              |
| R <sub>1</sub> [ <i>I</i> >2 $\sigma$ ( <i>I</i> )]       | 0.0211                                                                           | 0.0362                                                                           | 0.0249                                                                             |
| wR <sub>2</sub> (all data)                                | 0.0498                                                                           | 0.0855                                                                           | 0.0629                                                                             |
| Max. / min. residual electron density / e·Å <sup>-3</sup> | 0.251 / -0.241                                                                   | 1.303 / -0.280                                                                   | 0.710 / -0.626                                                                     |

Table S9:Continued

| Data                                                      | [Cu(TTA)tmenCl]<br><b>5</b>                                                        | [Cu(TTA)tmen]NO <sub>3</sub><br><b>6</b>                                         | [Cu(TTA) <sub>2</sub> tmen]<br><b>7</b>                                                       |
|-----------------------------------------------------------|------------------------------------------------------------------------------------|----------------------------------------------------------------------------------|-----------------------------------------------------------------------------------------------|
| CCDC number                                               | 2056495                                                                            | 2056496                                                                          | 2056497                                                                                       |
| Empirical formula                                         | C <sub>14</sub> H <sub>20</sub> ClCuF <sub>3</sub> N <sub>2</sub> O <sub>2</sub> S | C <sub>14</sub> H <sub>20</sub> CuF <sub>3</sub> N <sub>3</sub> O <sub>5</sub> S | C <sub>22</sub> H <sub>24</sub> CuF <sub>6</sub> N <sub>2</sub> O <sub>4</sub> S <sub>2</sub> |
| Formula weight / g·mol <sup>-1</sup>                      | 436.37                                                                             | 462.93                                                                           | 622.09                                                                                        |
| <i>T</i> / K                                              | 168(2)                                                                             | 168(2)                                                                           | 168(2)                                                                                        |
| Radiation, $\lambda$ / Å                                  | Mo-K $\alpha$ 0.71073                                                              | Mo-K $\alpha$ 0.71073                                                            | Mo-K $\alpha$ 0.71073                                                                         |
| Crystal size / mm <sup>3</sup>                            | 0.35×0.45×0.55                                                                     | 0.50×0.50×0.50                                                                   | 0.40×0.40×0.60                                                                                |
| Crystal colour, habit                                     | green block                                                                        | green block                                                                      | green block                                                                                   |
| $\mu$ / mm <sup>-1</sup>                                  | 1.521                                                                              | 1.350                                                                            | 1.066                                                                                         |
| Crystal system                                            | Monoclinic                                                                         | Monoclinic                                                                       | Monoclinic                                                                                    |
| Space group                                               | <i>P</i> 2 <sub>1</sub> / <i>n</i>                                                 | <i>P</i> 2 <sub>1</sub> / <i>n</i>                                               | <i>P</i> 2 <sub>1</sub> / <i>c</i>                                                            |
| <i>a</i> / Å                                              | 10.1537(14)                                                                        | 10.4518(14)                                                                      | 16.633(3)                                                                                     |
| <i>b</i> / Å                                              | 13.5200(19)                                                                        | 13.4241(18)                                                                      | 9.9312(18)                                                                                    |
| <i>c</i> / Å                                              | 13.2892(18)                                                                        | 13.3035(18)                                                                      | 16.773(3)                                                                                     |
| $\alpha$ / °                                              | 90                                                                                 | 90                                                                               | 90                                                                                            |
| $\beta$ / °                                               | 100.416(2)                                                                         | 96.356(2)                                                                        | 108.801(2)                                                                                    |
| $\gamma$ / °                                              | 90                                                                                 | 90                                                                               | 90                                                                                            |
| Volume / Å <sup>3</sup>                                   | 1794.3(4)                                                                          | 1855.1(4)                                                                        | 2622.9(8)                                                                                     |
| <i>Z</i>                                                  | 4                                                                                  | 4                                                                                | 4                                                                                             |
| $\rho_{\text{calc}}$ / g·cm <sup>-3</sup>                 | 1.615                                                                              | 1.658                                                                            | 1.575                                                                                         |
| <i>F</i> (000)                                            | 892                                                                                | 948                                                                              | 1268                                                                                          |
| $\theta$ range / °                                        | 2.167 – 28.917                                                                     | 2.162 – 26.999                                                                   | 2.419 – 26.000                                                                                |
| Reflections collected                                     | 28058                                                                              | 27678                                                                            | 43348                                                                                         |
| Unique reflections                                        | 4718                                                                               | 4054                                                                             | 5145                                                                                          |
| Parameters / restraints                                   | 221 / 0                                                                            | 248 / 0                                                                          | 403 / 43                                                                                      |
| GooF on <i>F</i> <sup>2</sup>                             | 1.061                                                                              | 1.051                                                                            | 1.116                                                                                         |
| R <sub>1</sub> [ <i>I</i> > 2 $\sigma$ ( <i>I</i> )]      | 0.0250                                                                             | 0.0325                                                                           | 0.0318                                                                                        |
| wR <sub>2</sub> (all data)                                | 0.0703                                                                             | 0.0918                                                                           | 0.0934                                                                                        |
| Max. / min. residual electron density / e·Å <sup>-3</sup> | 0.545 / -0.275                                                                     | 0.916 / -0.568                                                                   | 0.445 / -0.262                                                                                |

**Table S10:** Selected bond lengths (Å), distances (Å), and angles (°) of [Cu(TTA)phenNO<sub>3</sub>] (**1**), [Cu(TTA)bipyNO<sub>3</sub>] (**2**), [Cu(TTA)bipyCl] (**4**), [Cu(TTA)tmenCl] (**5**), [Cu(TTA)tmen]NO<sub>3</sub> (**6**), and [Cu(TTA)<sub>2</sub>tmen] (**7**). For atom labels see Figures S11 – S16 in the SI.

|                            | <b>1</b>   | <b>2</b>   | <b>4</b>   | <b>5</b>    | <b>6</b>             | <b>7</b>            |
|----------------------------|------------|------------|------------|-------------|----------------------|---------------------|
| Cu–N1                      | 1.996(3)   | 1.975(4)   | 1.9993(17) | 2.0751(12)  | 2.0306(17)           | 2.0556(16)          |
| Cu–N2                      | 2.017(3)   | 1.978(4)   | 2.0096(17) | 2.0376(12)  | 2.0189(16)           | 2.0610(16)          |
| Cu–O1                      | 1.927(2)   | 1.918(4)   | 1.9480(15) | 1.9625(10)  | 1.9292(14)           | 1.9904(13)          |
| Cu–O2                      | 1.929(2)   | 1.926(4)   | 1.9458(15) | 1.9389(10)  | 1.9215(14)           | 2.2814(13)          |
| Cu–O3/Cl1                  | 2.241(2)   | 2.280(7)   | 2.4712(10) | 2.5048(5)   | 2.8265(18)           | 2.2916(14)          |
| Cu–O4/O5                   |            |            |            |             | 2.6062(16)           | 1.9596(14)          |
| O1–Cu–O2                   | 93.59(10)  | 92.23(15)  | 92.45(6)   | 91.52(4)    | 93.27(6)             | 83.40(5)            |
| O1–Cu–N1                   | 169.70(11) | 165.46(17) | 91.21(6)   | 156.10(5)   | 89.26(6)             | 92.05(6)            |
| O2–Cu–N1                   | 92.12(11)  | 91.78(17)  | 161.43(6)  | 89.78(5)    | 172.72(7)            | 94.69(6)            |
| O1–Cu–N2                   | 90.44(11)  | 92.72(16)  | 161.11(6)  | 87.09(4)    | 175.49(6)            | 174.13(6)           |
| O2–Cu–N2                   | 168.58(10) | 171.06(17) | 89.87(6)   | 166.67(5)   | 90.26(6)             | 91.03(6)            |
| N1–Cu–N2                   | 82.40(12)  | 81.65(18)  | 80.98(6)   | 86.20(5)    | 87.57(7)             | 86.56(6)            |
| O1–Cu–O3/Cl1               | 93.52(10)  | 105.95(15) | 97.18(5)   | 101.41(4)   | 83.41(6)             | 86.07(5)            |
| O2–Cu–O3/Cl1               | 104.97(9)  | 89.87(16)  | 97.77(5)   | 95.59(4)    | 76.44(5)             | 167.17(5)           |
| N1–Cu–O3/Cl1               | 93.27(11)  | 88.03(17)  | 99.83(6)   | 102.21(4)   | 97.09(6)             | 93.00(6)            |
| N2–Cu–O3/Cl1               | 85.41(10)  | 95.92(17)  | 101.08(5)  | 97.68(4)    | 100.17(6)            | 99.69(6)            |
| O1–Cu–O4/O5                |            |            |            |             | 84.75(6)             | 92.81(6)            |
| N1–Cu–O4/O5                |            |            |            |             | 98.20(6)             | 174.49(6)           |
| O3–Cu–O4/O5                |            |            |            |             | 160.49(5)            | 84.74(6)            |
| N2–Cu–O4/O5                |            |            |            |             | 92.52(6)             | 88.86(7)            |
| O2–Cu–O4/O5                |            |            |            |             | 88.84(6)             | 88.46(6)            |
| N1–N2–O1–O2                | 1.74(12)   | 4.98(17)   |            | -7.54(5)    |                      |                     |
| N1–N2–O2–O1                |            |            | -0.61(6)   |             | 6.96(6)              |                     |
| N1–N2–O4–O1                |            |            |            |             |                      | 6.14(6)             |
| N2–N1–O2–O1                | 1.72(12)   |            |            |             |                      |                     |
| Cu–plane <sub>square</sub> | 0.1574(17) | 0.174(2)   | 0.3050(7)  | 0.3203(6)   | 0.0333(8)            | 0.0252(8)           |
| ∠Cu–O, plane               | 9.71(9)    | 9.62(14)   | 2.35(4)    | 1.47(3)     | 6.15(5),<br>13.36(5) | 4.95(5),<br>7.92(5) |
| O3/Cl–Cu–O1–C              | 90.8(3)    | -80.5(4)   | 93.44(14)  | 100.39(11)  | -76.47(15)           |                     |
| O3/Cl–Cu–O2–C              | -78.1(3)   | 95.9(4)    | -90.66(15) | -106.06(11) | 79.59(15)            |                     |
| O3/Cl–Cu–N2–C              | -88.0(3)   | 84.4(3)    | 97.71(13)  | -76.60(9)   | -113.4(1)            |                     |
| O3/Cl–Cu–N1–C              | 78.9(3)    | -93.5(4)   | -99.81(13) | 98.42(9)    | 89.00(13)            |                     |
| Cl1–Cu–O1–O2               |            |            | 98.15(5)   | 96.01(4)    |                      |                     |
| Cl1–Cu–N1–N2               |            |            | -99.78(5)  | 97.05(4)    |                      |                     |

**Table S11:** Continuous Shape measurements (CSM) of the complexes

| <b>Five-coordinate complexes</b> |          |                 |                    |                    |                                   |                            |
|----------------------------------|----------|-----------------|--------------------|--------------------|-----------------------------------|----------------------------|
|                                  | Lable    | PP-5            | vOC-5              | TBPY-5             | SPY-5                             | JTBPY-5                    |
|                                  | Shape    | Pentagon        | Vacant octahedron  | Trigonal bipyramid | Square pyramid                    | Johnson trigonal bipyramid |
|                                  | Symmetry | D <sub>5h</sub> | C <sub>4v</sub>    | D <sub>3h</sub>    | C <sub>4v</sub>                   | D <sub>3h</sub>            |
| <b>1</b>                         |          | 29.642          | 0.989              | 5.861              | <b>0.868</b>                      | 8.460                      |
| <b>2</b>                         |          | 28.679          | 1.369              | 5.055              | <b>0.923</b>                      | 7.856                      |
| <b>4</b>                         |          | 32.101          | 2.415              | 5.698              | <b>0.598</b>                      | 9.313                      |
| <b>5</b>                         |          | 32.901          | 2.515              | 4.154              | <b>0.637</b>                      | 8.037                      |
| <b>Four-coordinate complex</b>   |          |                 |                    |                    |                                   |                            |
|                                  | Lable    | SP-4            | T-4                | SS-4               | vTBPY                             |                            |
|                                  | Shape    | Square          | Tetrahedron        | Seesaw             | Axially vacant trigonal bipyramid |                            |
|                                  | Symmetry | D <sub>4h</sub> | T <sub>d</sub>     | C <sub>2v</sub>    | C <sub>3v</sub>                   |                            |
| <b>6</b>                         |          | <b>0.219</b>    | 29.348             | 16.071             | 30.862                            |                            |
| <b>Six-coordinate complex</b>    |          |                 |                    |                    |                                   |                            |
|                                  | Lable    | HP-6            | PPY-6              | OC-6               | TPR-6                             | JPPY-5                     |
|                                  | Shape    | Hexagon         | Pentagonal pyramid | Octahedron         | Trigonal prism                    | Johnson pentagonal pyramid |
|                                  | Symmetry | D <sub>6h</sub> | C <sub>5v</sub>    | O <sub>h</sub>     | D <sub>3h</sub>                   | C <sub>5v</sub>            |
| <b>7</b>                         |          | 33.271          | 25.565             | <b>0.981</b>       | 12.686                            | 29.090                     |

**Table S12:** Calculated absorption UV-visible spectra from TD-DFT at the m06-2x/6-311++G(d,p) level of theory

|                        | [Cu(TTA)phenNO3]<br><b>1</b> | [Cu(TTA)bipyNO3]<br><b>2</b> | [Cu(TTA)phenCl]<br><b>3</b> | [Cu(TTA)<br>bipyCl]<br><b>4</b> | [Cu(TTA)tmnCl]<br><b>5</b> | [Cu(TTA)tmnNO3]<br><b>6</b> | [Cu(TTA)tmnNO3]<br><b>7</b> |
|------------------------|------------------------------|------------------------------|-----------------------------|---------------------------------|----------------------------|-----------------------------|-----------------------------|
| <b>nm</b>              | 524.55                       | 481.17                       | 513.34                      | 524.42                          | 397.14                     | 401.93                      | 411.2                       |
| <b>cm<sup>-1</sup></b> | 19063.96                     | 20782.68                     | 19480.27                    | 19068.69                        | 25180.04                   | 24879.95                    | 2431                        |



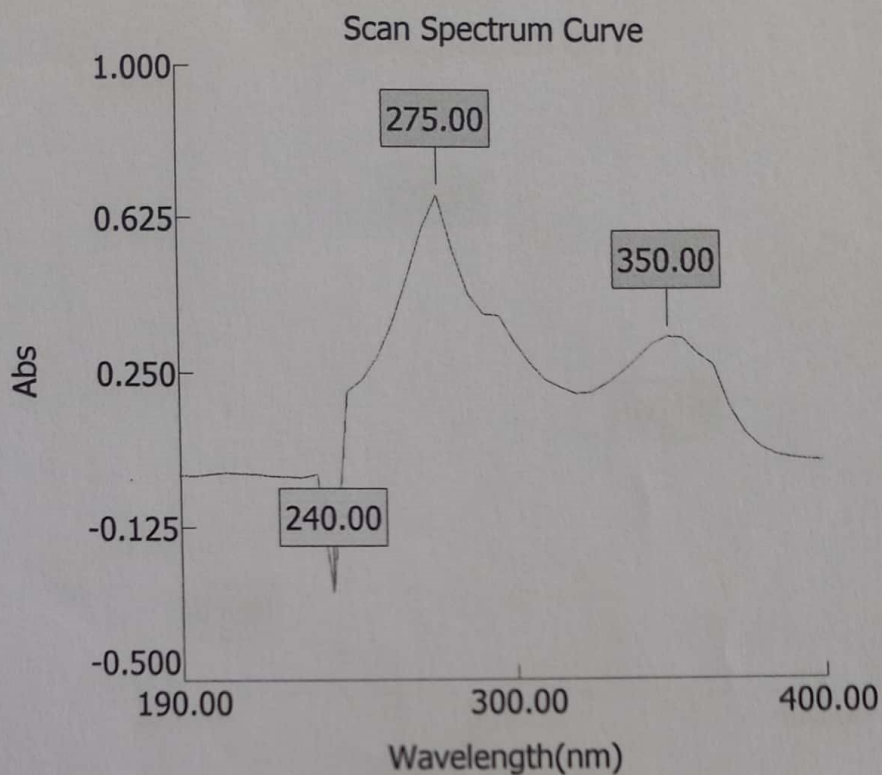

|   |        |        |        |
|---|--------|--------|--------|
| 1 | Peak   | 350.00 | 0.336  |
| 2 | Peak   | 275.00 | 0.684  |
| 1 | Valley | 240.00 | -0.287 |

$\text{Cu}(\text{CFA})\text{Phen} \cdot \text{H}_2\text{O}_3$  in  
Chloroform

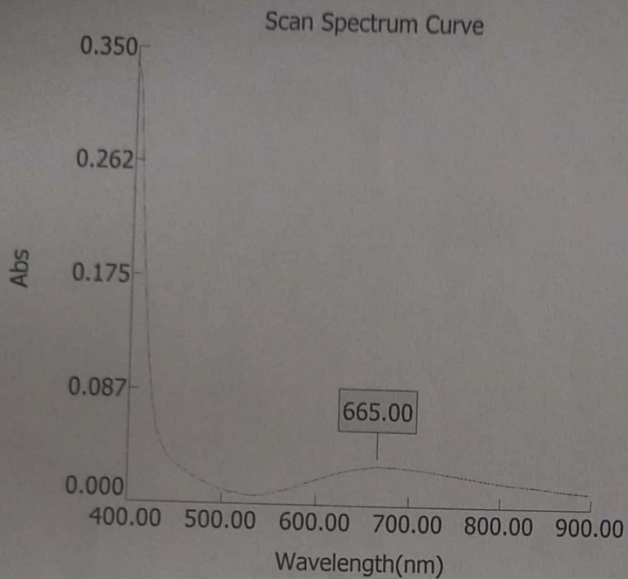

● **Instrument Performance**

Model : SPECTRO UV/VIS  
Spectral Bandwidth : 2.00 nm

● **Scan Spectrum Performance**

Scan Range : 400.00 to 900.00 nm  
Measure Mode : Abs  
Interval : 5.00 nm  
Speed : Fast  
Data File : CuTPNcv2.spd  
Create Date/Time : Sunday, January 01, 2006  
Data Type : Original  
Method File:

● **Analyse Note**

Analyser : Administrator  
Sample Name :  
Comment :

● **No. P/V Wavelength(nm) Abs Co**

*Cu(TTA)Phen NO<sub>3</sub> in  
Chloroform*

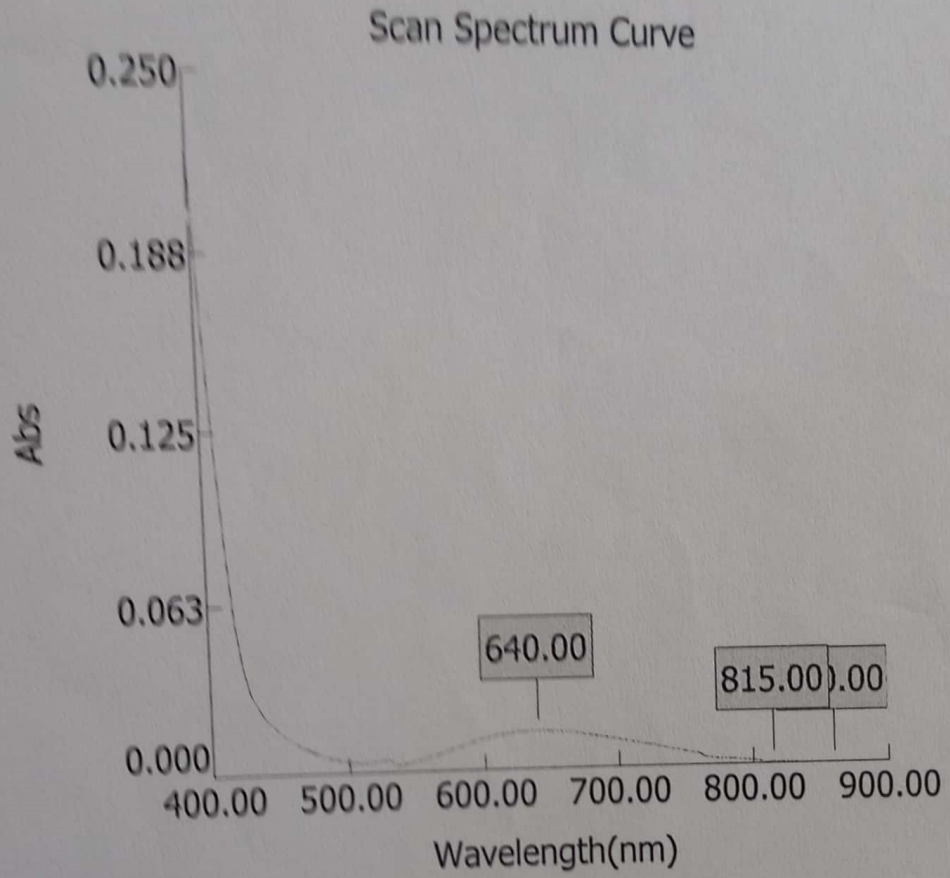

|   |      |        |       |
|---|------|--------|-------|
| 1 | Peak | 860.00 | 0.000 |
| 2 | Peak | 815.00 | 0.001 |
| 3 | Peak | 640.00 | 0.014 |

Cu(TTA)PheNO<sub>3</sub> in  
Methanol

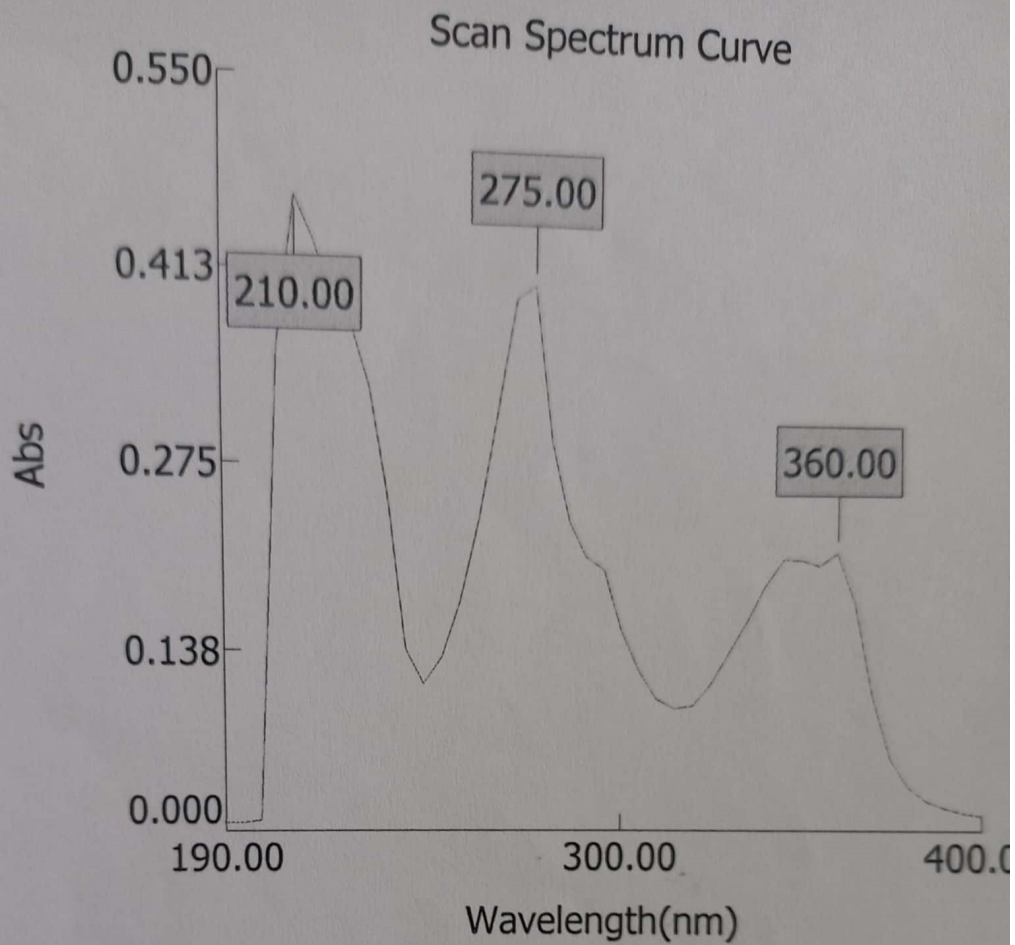

|   |      |        |       |
|---|------|--------|-------|
| 1 | Peak | 360.00 | 0.212 |
| 2 | Peak | 275.00 | 0.405 |
| 3 | Peak | 210.00 | 0.464 |

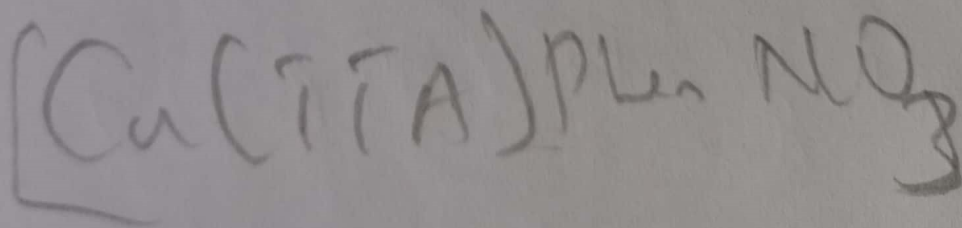

in UV

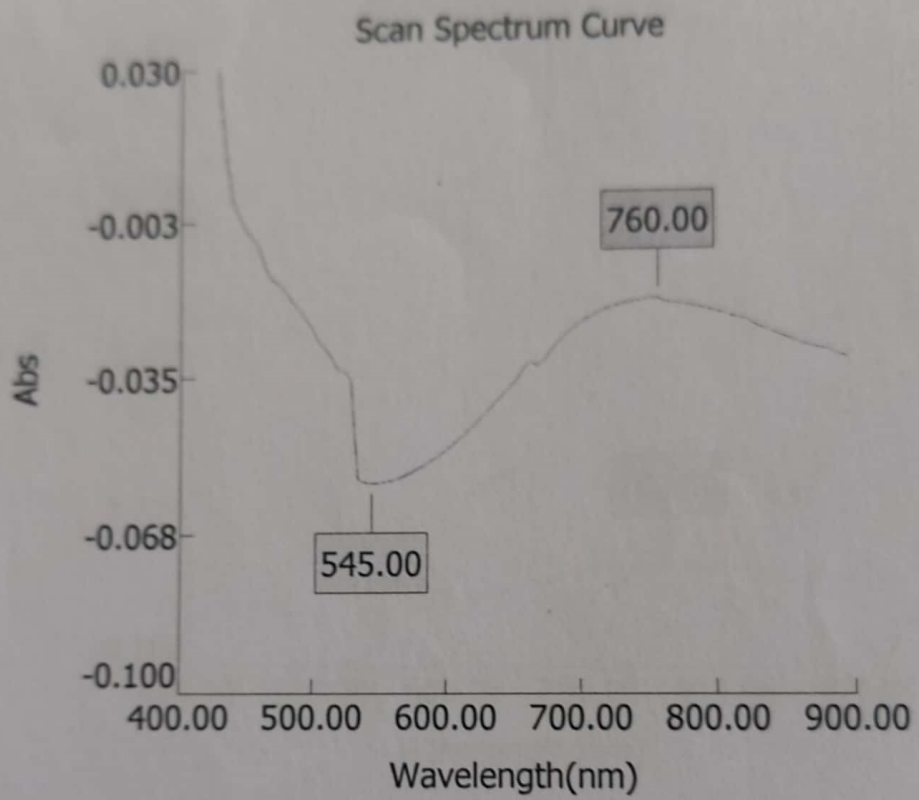

|   |        |        |        |
|---|--------|--------|--------|
| 1 | Peak   | 760.00 | -0.019 |
| 1 | Valley | 545.00 | -0.057 |

$[Cu(ITA)PhenCl]$  in  
Chloroform

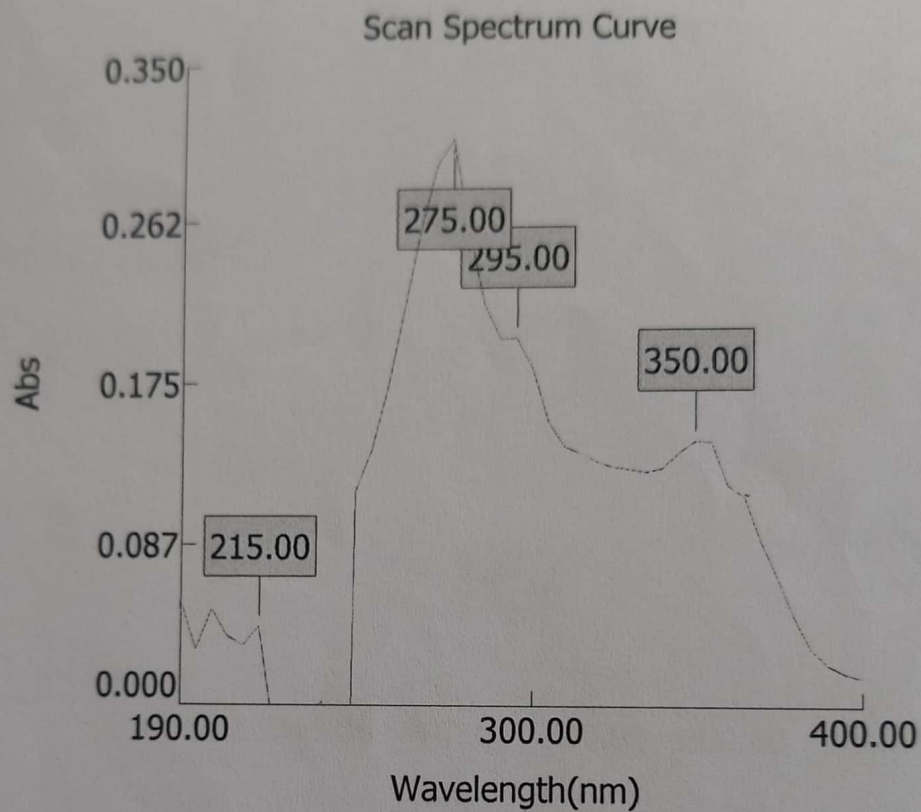

|   |      |        |       |
|---|------|--------|-------|
| 1 | Peak | 350.00 | 0.143 |
| 2 | Peak | 295.00 | 0.199 |
| 3 | Peak | 275.00 | 0.308 |
| 4 | Peak | 215.00 | 0.043 |

*[Cu(TTA)Phen]Cl*  
*in chloroform*

Scan Spectrum Curve

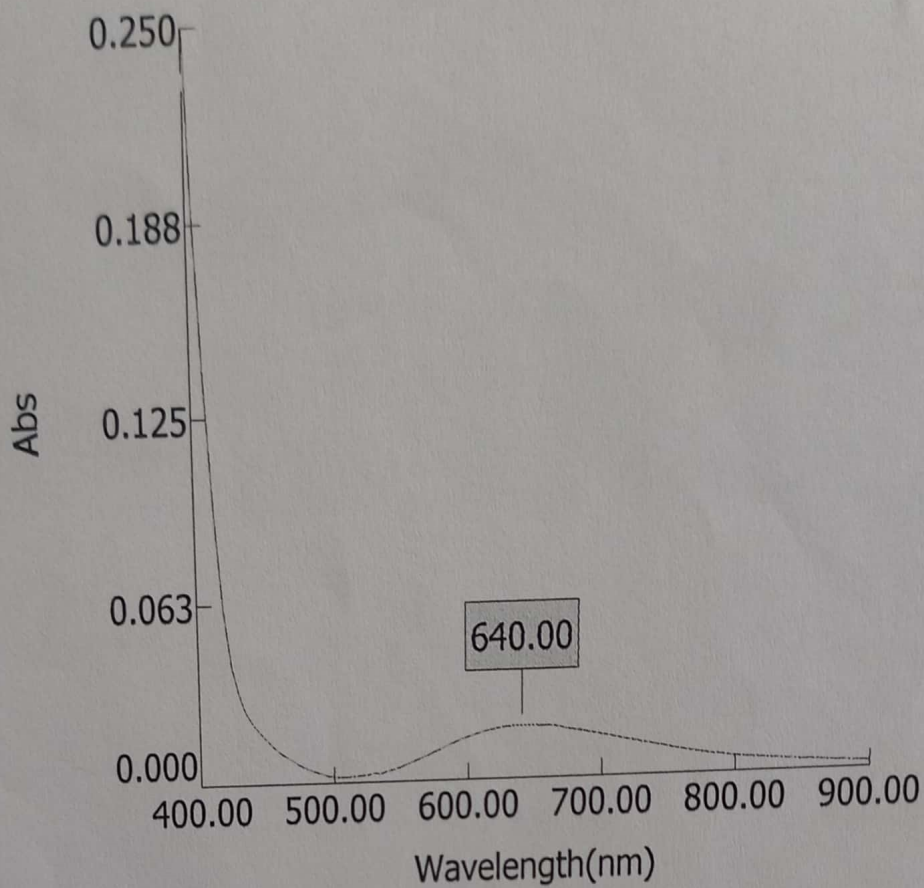

1 Peak 640.00 0.018

*CuCl<sub>2</sub>(TIA) Phenol in Methanol*

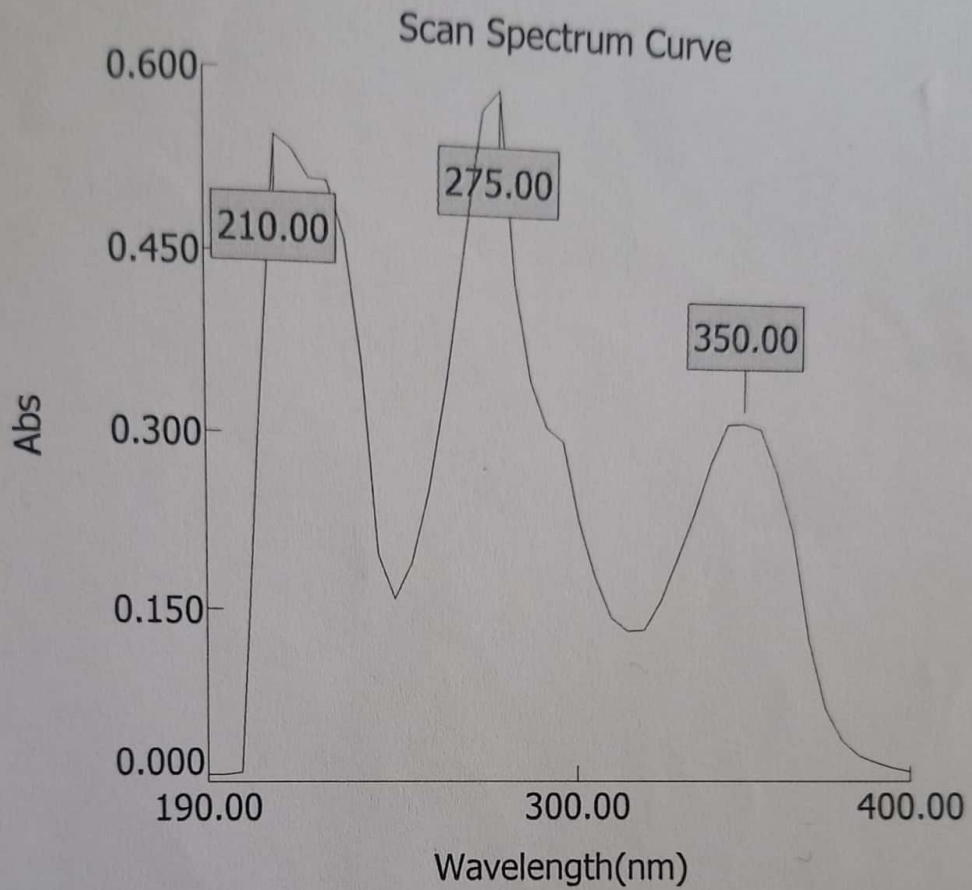

|   |      |        |       |
|---|------|--------|-------|
| 1 | Peak | 350.00 | 0.316 |
| 2 | Peak | 275.00 | 0.589 |
| 3 | Peak | 210.00 | 0.546 |

$\text{Cu(TTA)Phen}$  in  
Methanol.



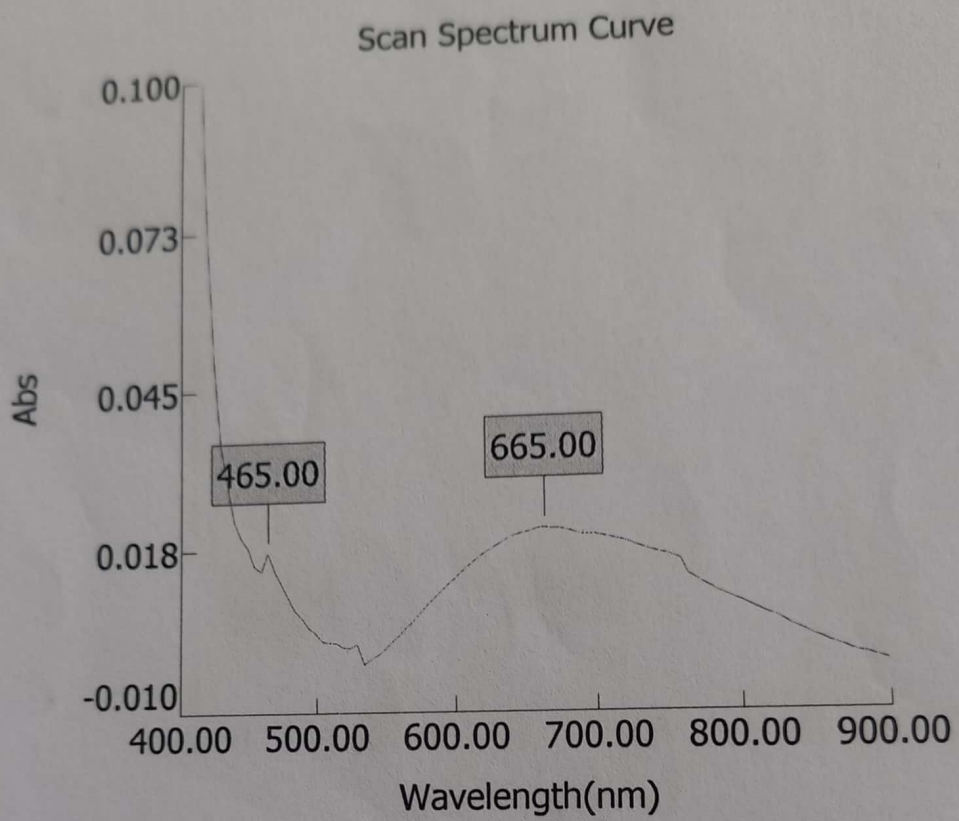

$[Cu(TTA)_2] \cdot 2H_2O$  in  
Chloroform

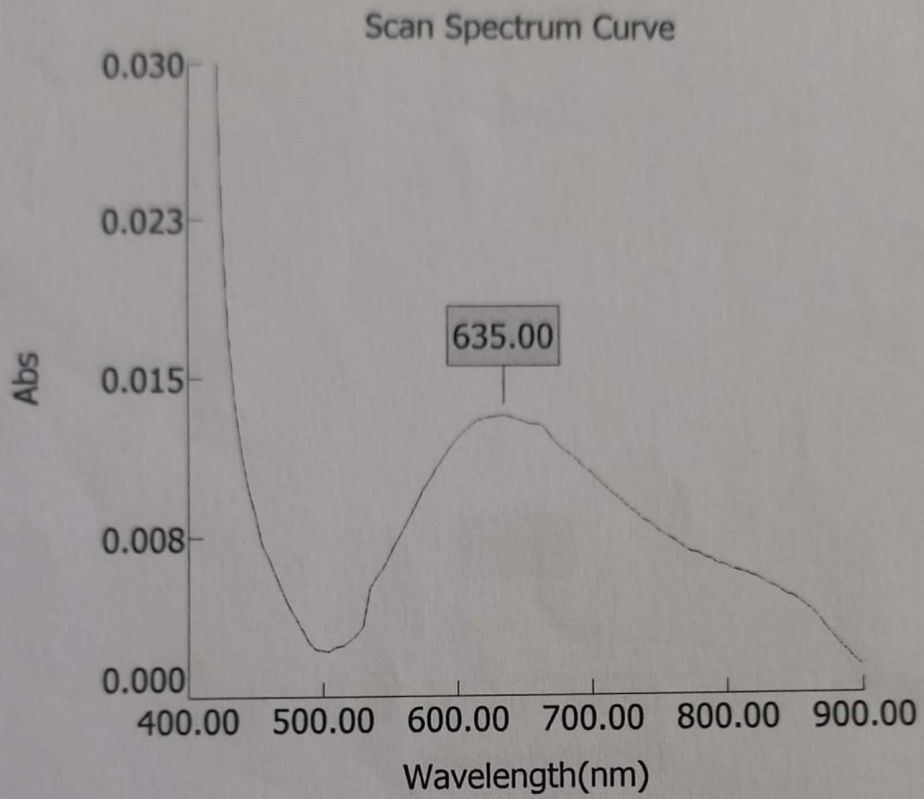

1 Peak 635.00 0.013

$\text{Cu}(\text{TAA})\text{By} \text{NO}_3$  in  
Methanol.

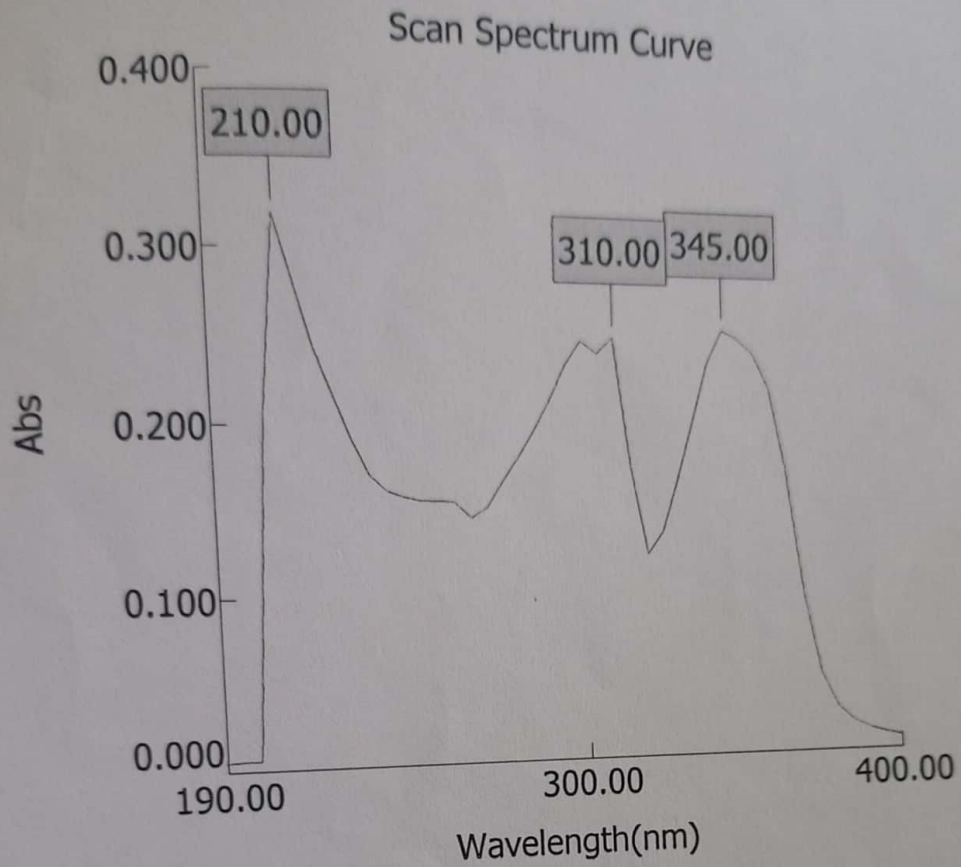

|   |      |        |       |
|---|------|--------|-------|
| 1 | Peak | 345.00 | 0.258 |
| 2 | Peak | 310.00 | 0.253 |
| 3 | Peak | 210.00 | 0.319 |

$\text{Cu}(\text{TiO})\text{Byy} \text{NO}_3$  in  
Methanol

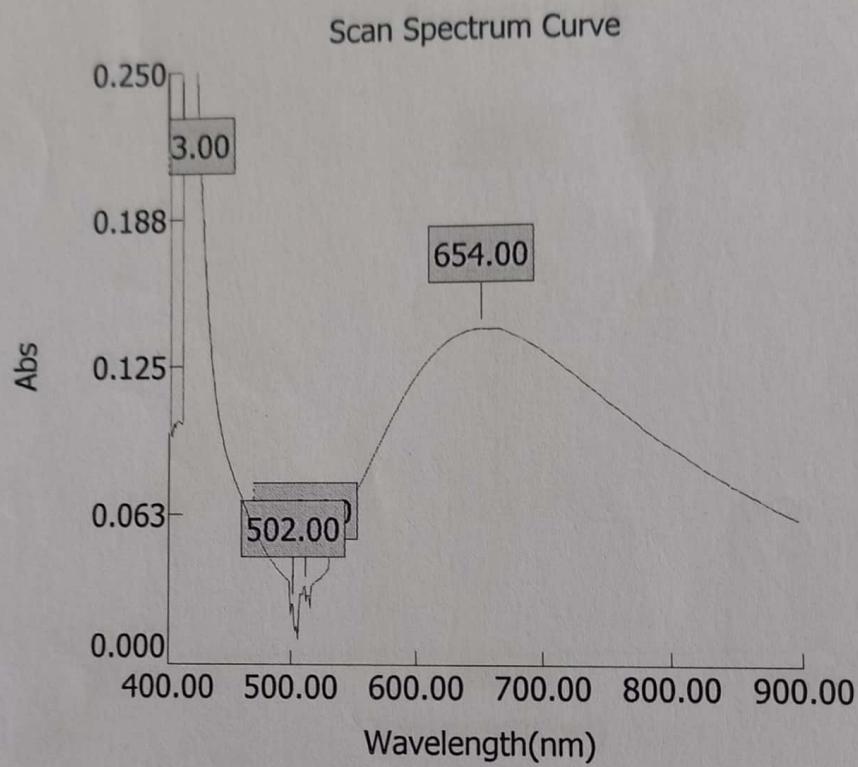

$[Cu(TTA)IMEN]NO_3$   
 in chloroform.

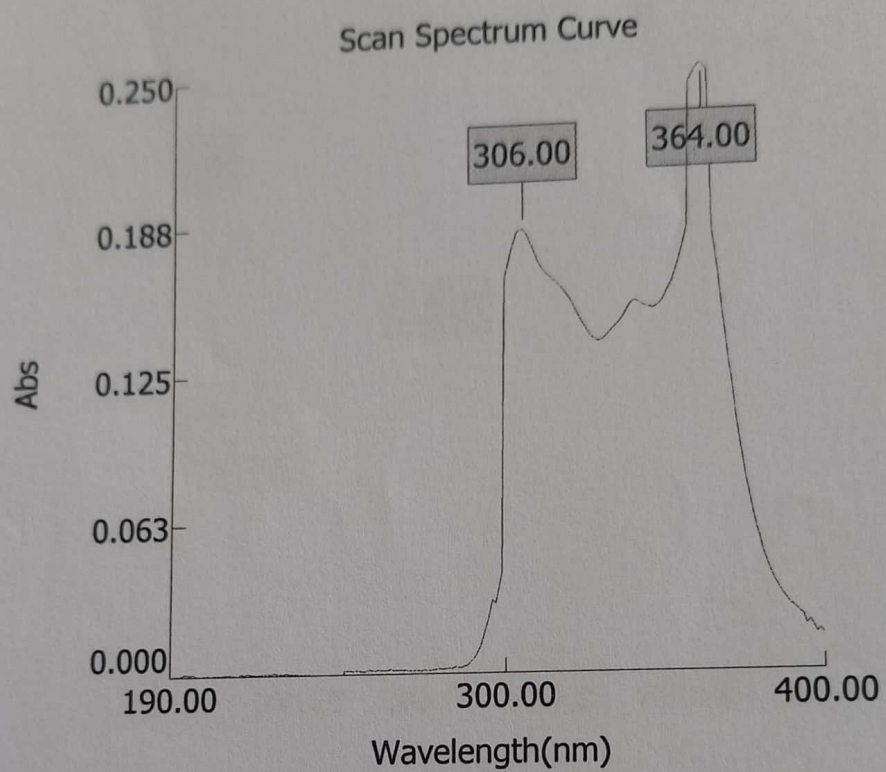

$[Cu(TTA)TMEN]NO_3$   
in chloroform

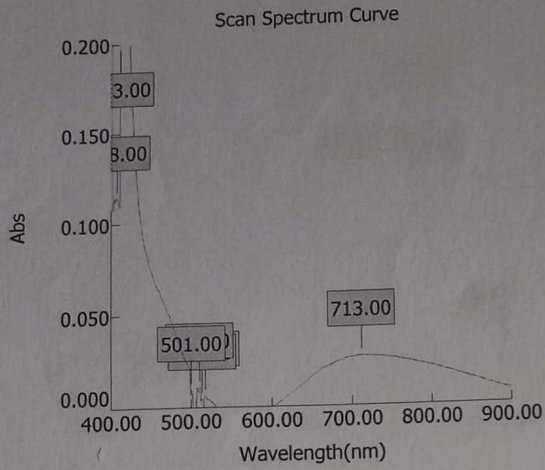

● **Instrument Performance**  
 Model : SPECTRO UV/VIS  
 Spectral Bandwidth : 2.00 nm

● **Scan Spectrum Performance**  
 Scan Range : 400.00 to 900.00 nm  
 Measure Mode : Abs  
 Interval : 1.00 nm  
 Speed : Medium  
 Data File : CUTTATMEOacv.spd  
 Create Date/Time : Sunday, January 01, 2006 1:50:31 AM  
 Data Type : Original  
 Method File:

● **Analyse Note**  
 Analyser : Administrator  
 Sample Name :  
 Comment :

● **No. P/V Wavelength(nm) Abs Comment**

|   |      |        |       |  |
|---|------|--------|-------|--|
| 1 | Peak | 713.00 | 0.027 |  |
| 2 | Peak | 518.00 | 0.006 |  |
| 3 | Peak | 514.00 | 0.005 |  |
| 4 | Peak | 511.00 | 0.011 |  |
| 5 | Peak | 501.00 | 0.009 |  |
| 6 | Peak | 413.00 | 0.463 |  |
| 7 | Peak | 408.00 | 0.114 |  |

*chloroform*

14, 1

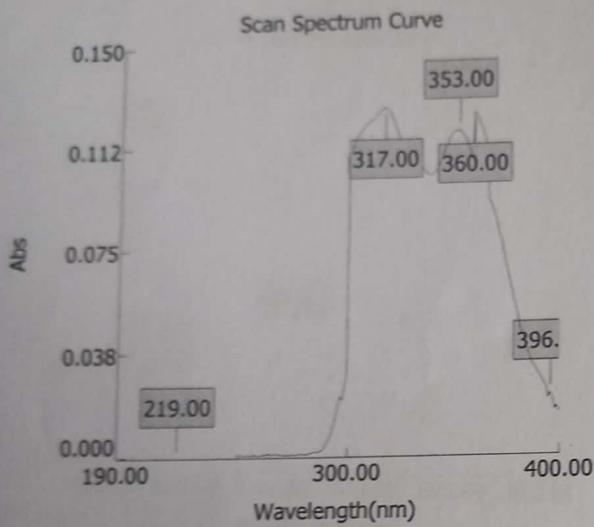

● **Instrument Performance**

Model : SPECTRO UV/VIS  
Spectral Bandwidth : 2.00 nm

● **Scan Spectrum Performance**

Scan Range : 190.00 to 400.00 nm  
Measure Mode : Abs  
Interval : 1.00 nm  
Speed : Medium  
Data File : CuTTATMEOAccuv.spd  
Create Date/Time : Sunday, January 01, 2006 2:55:26  
Data Type : Original  
Method File:

● **Analyse Note**

Analyser : Administrator  
Sample Name :  
Comment :

|   |      |        |       |
|---|------|--------|-------|
| 1 | Peak | 396.00 | 0.022 |
| 2 | Peak | 360.00 | 0.125 |
| 3 | Peak | 353.00 | 0.118 |
| 4 | Peak | 317.00 | 0.127 |
| 5 | Peak | 219.00 | 0.000 |

● **No. P/V Wavelength(nm) Abs Comme**

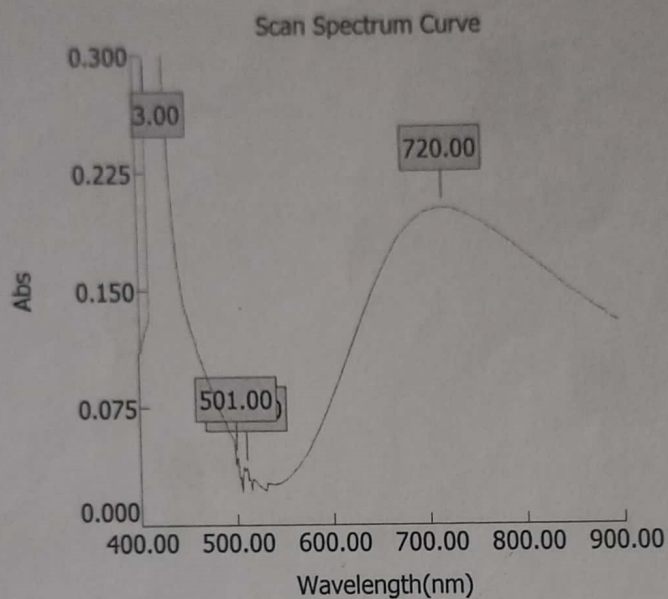

- **Instrument Performance**  
Model : SPECTRO UV/VIS  
Spectral Bandwidth : 2.00 nm

- **Scan Spectrum Performance**  
Scan Range : 400.00 to 900.00  
Measure Mode : Abs  
Interval : 1.00 nm  
Speed : Medium  
Data File : CuTTATMEClcv.sp  
Create Date/Time : Sunday, ...  
Data Type : Original  
Method File:

- **Analyse Note**  
Analyser : Administrator  
Sample Name :  
Comment :

- **No. P/V Wavelength**

|   |      |        |       |
|---|------|--------|-------|
| 1 | Peak | 720.00 | 0.202 |
| 2 | Peak | 511.00 | 0.036 |
| 3 | Peak | 501.00 | 0.042 |
| 4 | Peak | 413.00 | 0.686 |

*(Cu(TIA)imecl) in  
chloroform.*



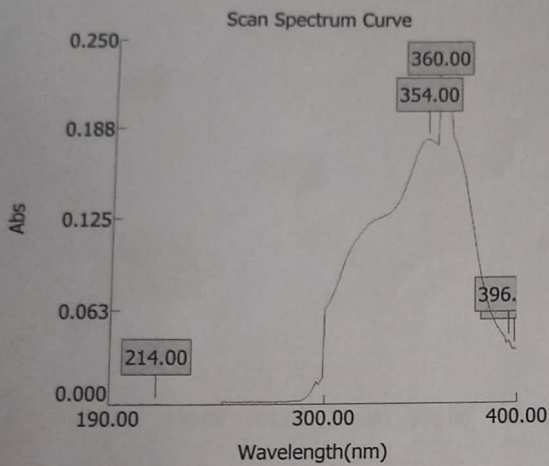

- **Instrument Performance**  
Model : SPECTRO UV/VIS  
Spectral Bandwidth : 2.00 nm
- **Scan Spectrum Performance**  
Scan Range : 190.00 to 400.00 nm  
Measure Mode : Abs  
Interval : 1.00 nm  
Speed : Medium  
Data File : CuTTATMECluv.spd  
Create Date/Time : Sunday, January 01, 2006 2:59:09 AM  
Data Type : Original  
Method File:

- **Analyse Note**  
Analyser : Administrator  
Sample Name :  
Comment :

| No. | P/V  | Wavelength(nm) | Abs   |
|-----|------|----------------|-------|
| 1   | Peak | 399.00         | 0.037 |
| 2   | Peak | 396.00         | 0.042 |
| 3   | Peak | 360.00         | 0.207 |
| 4   | Peak | 354.00         | 0.181 |
| 5   | Peak | 214.00         | 0.000 |

● **No. P/V Wavelength(nm) Abs Comment**

*Cu(TTA) in cu*  
*in chloroform.*

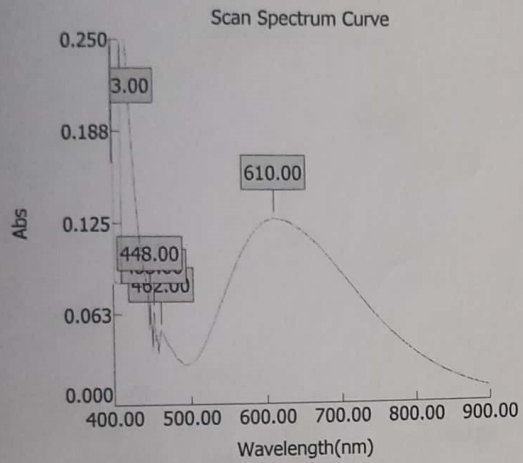

|   |      |        |       |
|---|------|--------|-------|
| 1 | Peak | 610.00 | 0.129 |
| 2 | Peak | 462.00 | 0.052 |
| 3 | Peak | 453.00 | 0.064 |
| 4 | Peak | 448.00 | 0.073 |
| 5 | Peak | 413.00 | 0.328 |

● **Instrument Performance**

Model : SPECTRO UV/VIS  
Spectral Bandwidth : 2.00 nm

● **Scan Spectrum Performance**

Scan Range : 400.00 to 900.00 nm  
Measure Mode : Abs

Interval : 1.00 nm

Speed : Medium

Data File : CuTTATMEClmv.spd

Create Date/Time : Sunday, January 01, 2006 1:12:56 AM

Data Type : Original

Method File:

● **Analyse Note**

Analysar : Administrator

Sample Name :

Comment :

● **No. P/V Wavelength(nm) Abs Comment**

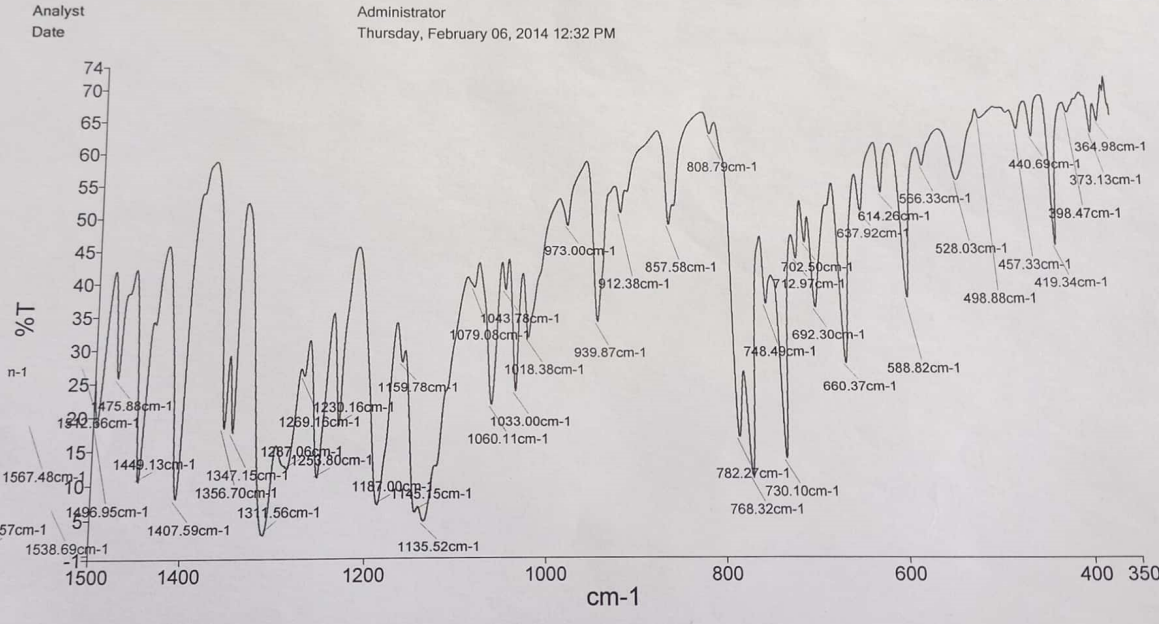

— CuTBC NEW Sample CuTBC NEW By Administrator Date Tuesday, August 06 2013

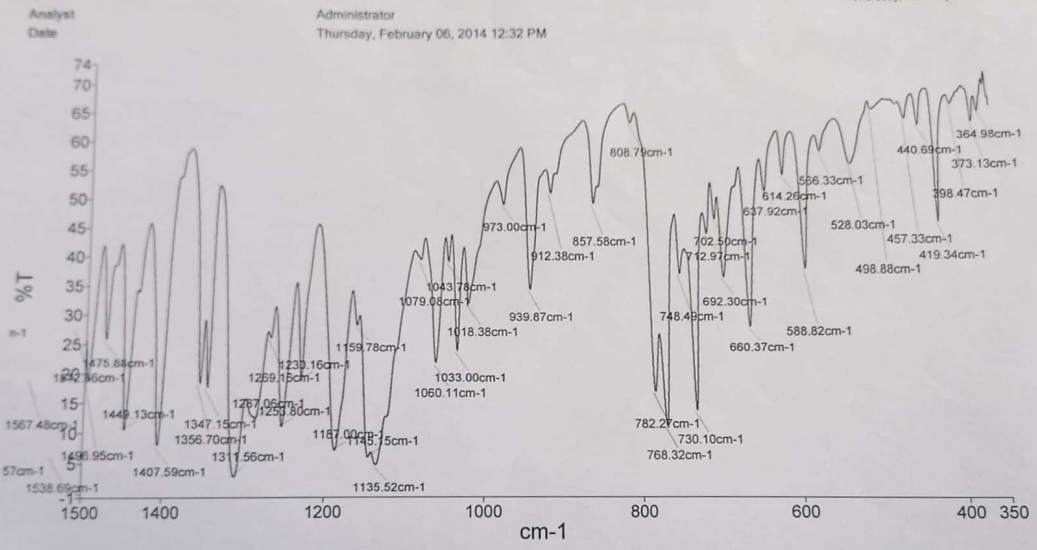

— CuTBC NEW Sample CuTBC NEW By Administrator Date Tuesday, August 06 2013

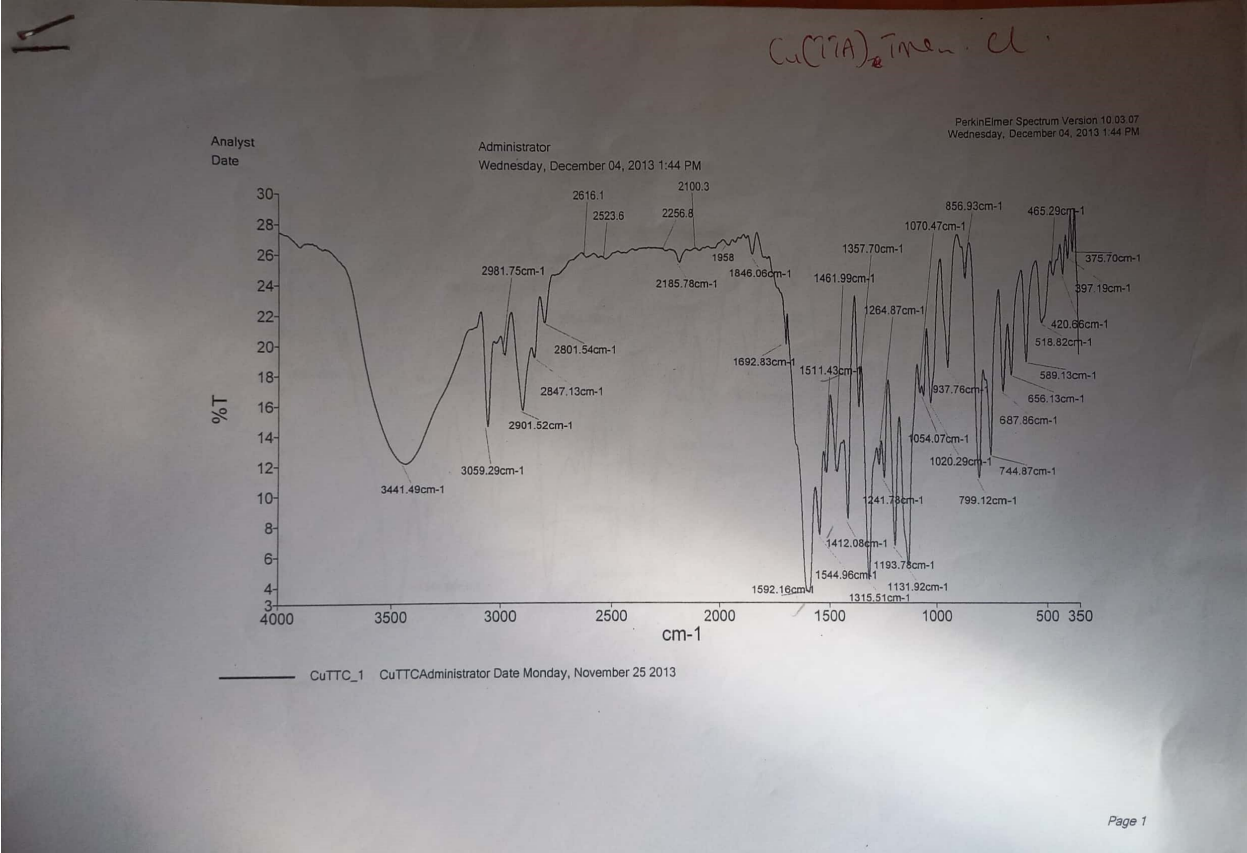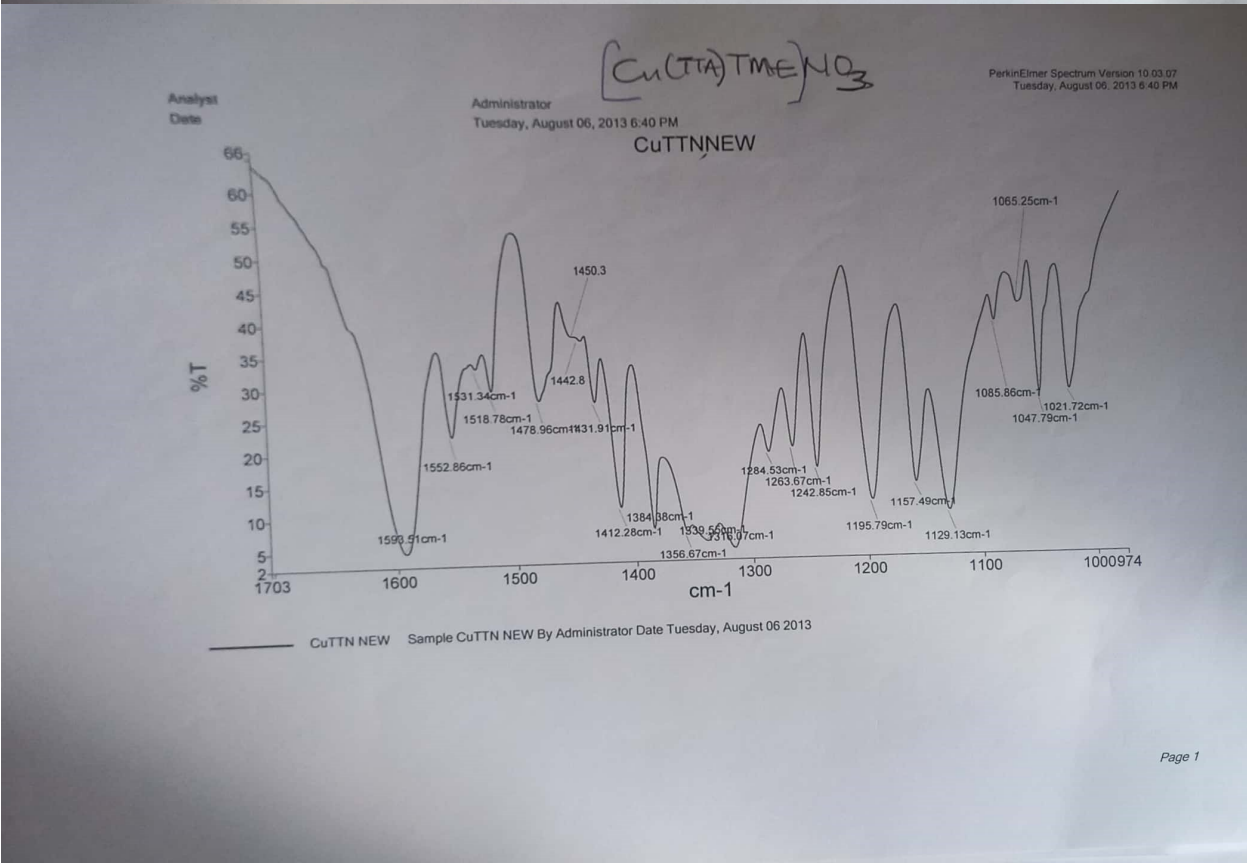

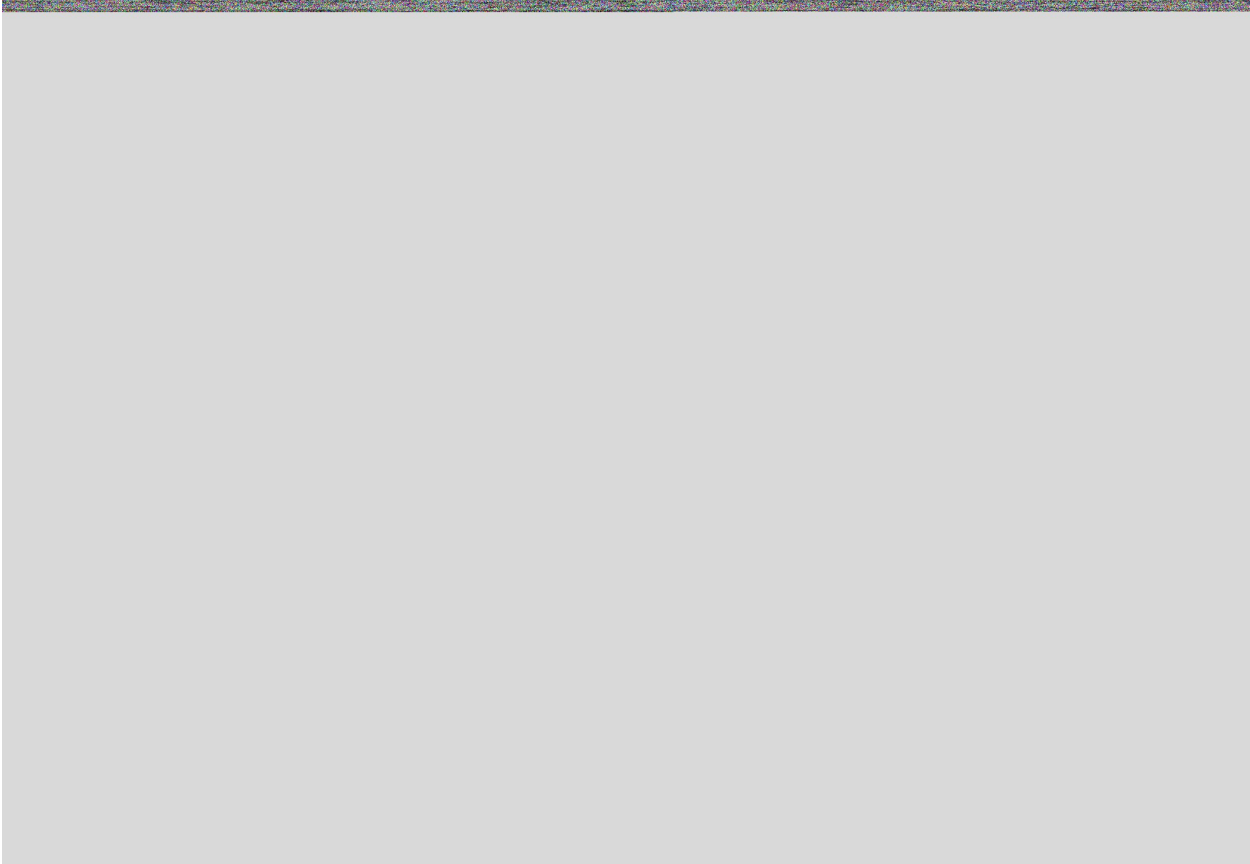

Analyst  
Date

Administrator  
Thursday, June 27, 2013 6:57 PM

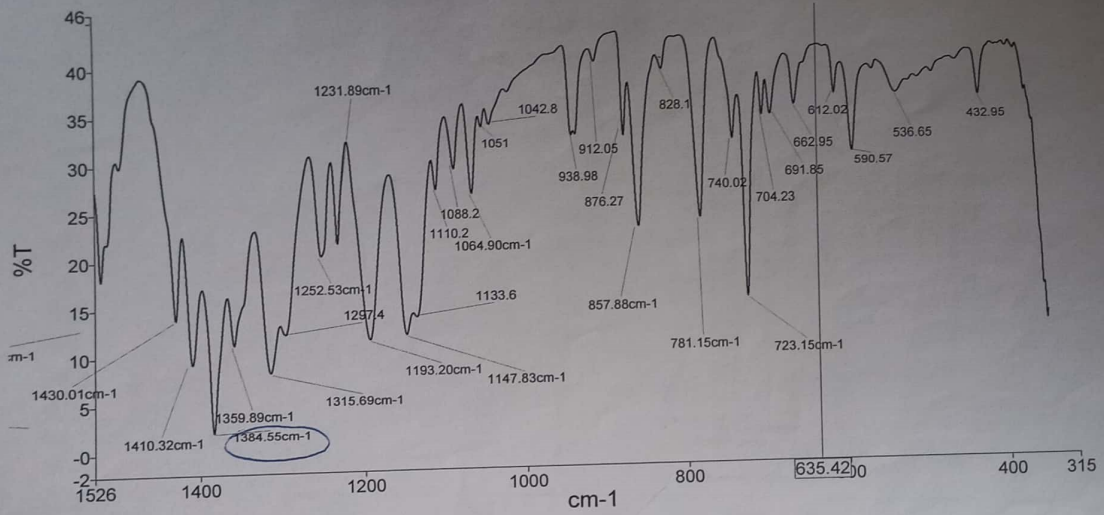

W NEW Sample W NEW By Administrator Date Thursday, June 27 2013

Page

*Cu(TTA)Phen H<sub>2</sub>O<sub>3</sub> new*

Cu(TA)Bipy Cl NEW

Park/Emmer Spectrum Version 10.03.07  
Tuesday, August 06, 2013 3:44 PM

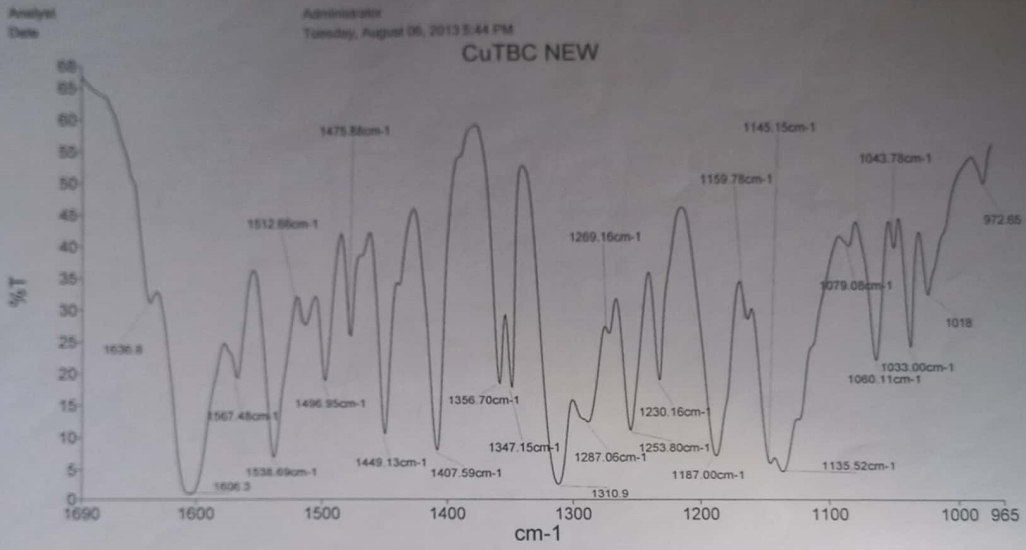

— CuTBC NEW Sample CuTBC NEW By Administrator Date Tuesday, August 06 2013



Cu(TTA)PhenCl new

PerkinElmer Spectrum Version 10.03.07  
Tuesday, August 06, 2013 3:28 PM

Analyst  
Date

Administrator  
Tuesday, August 06, 2013 3:28 PM

CuT PC new

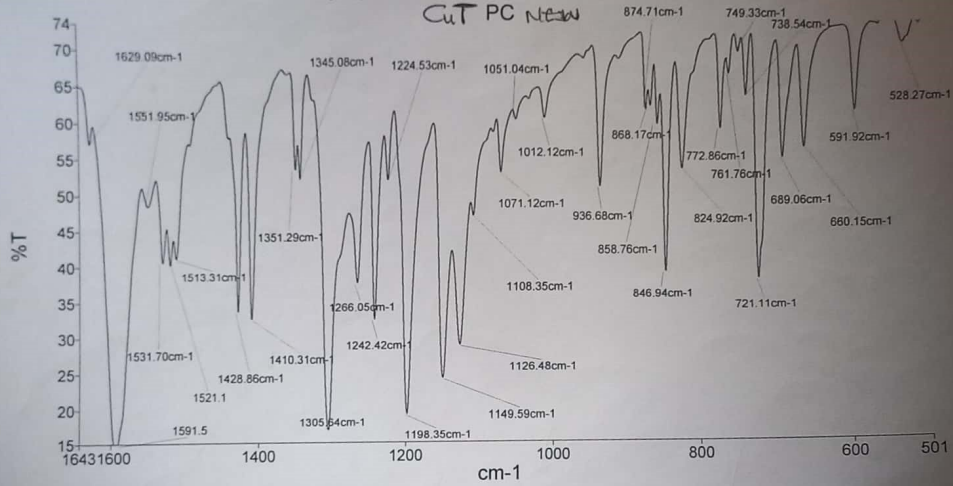

PC Sample PC By Administrator Date Tuesday, August 06 2013

Cu(IIA)Bipy NO<sub>3</sub>

PerkinElmer Spectrum Version 10.03.07  
Thursday, July 04, 2013 4:15 PM

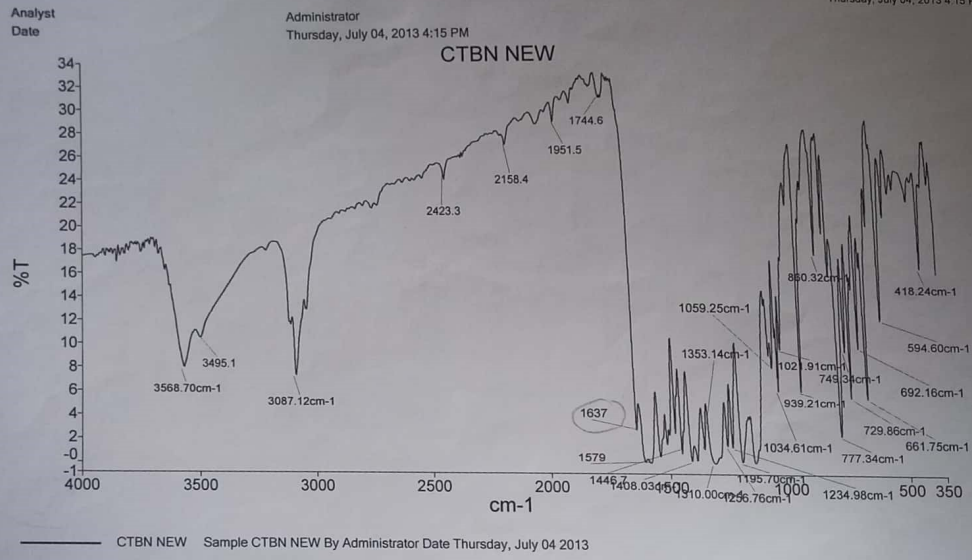

Supplement: d2ra02428d1.pdf [file d2ra02428d1.pdf]
